# Supplementary material for: Indole produced during dysbiosis mediates host–microorganism chemical communication
Source: eLife. 2023 Nov 21;12:e85362. doi: 10.7554/eLife.85362 (PMC10691800; doi:10.7554/eLife.85362)
Supplement: Figure 1—figure supplement 1—source data 1. [file elife-85362-fig1-figsupp1-data1.xlsx]

## Sheet: FIGS1C
Relative florenscence (%) of dod-3p::gfp
Day 1		Day 4
OP50	HK OP50	OP50	HK OP50
100	87.0102	503.112	121.564
100	89.3272	524.26	89.3741
100	90.0259	511.089	123.89
Day 4
Column D	HK OP50
vs.	vs.
Column C	OP50
Unpaired t test
P value	<0.001
P value summary	***
Significantly different (P < 0.05)?	Yes
One- or two-tailed P value?	Two-tailed
t, df	t=31.51, df=4
How big is the difference?
Mean of column C	512.8
Mean of column D	111.6
Difference between means (D - C) ± SEM	-401.2 ± 12.73
95% confidence interval	-436.6 to -365.9
R squared (eta squared)	0.996
F test to compare variances
F, DFn, Dfd	3.263, 2, 2
P value	0.4692
P value summary	ns
Significantly different (P < 0.05)?	No
Data analyzed
Sample size, column C	3
Sample size, column D	3

## Sheet: FIGS1D
Relative florenscence (%) of hsp-16.2p::nCherry
Day 1		Day 4
OP50	HK OP50	OP50	HK OP50
100	125.984	277.276	73.5576
100	108.471	184.386	88.9405
100	139.348	350.467	68.4862
Day 4
Column D	HK OP50
vs.	vs.
Column C	OP50
Unpaired t test
P value	0.0162
P value summary	*
Significantly different (P < 0.05)?	Yes
One- or two-tailed P value?	Two-tailed
t, df	t=3.998, df=4
How big is the difference?
Mean of column C	270.7
Mean of column D	76.99
Difference between means (D - C) ± SEM	-193.7 ± 48.45
95% confidence interval	-328.2 to -59.20
R squared (eta squared)	0.7999
F test to compare variances
F, DFn, Dfd	61.06, 2, 2
P value	0.0322
P value summary	*
Significantly different (P < 0.05)?	Yes
Data analyzed
Sample size, column C	3
Sample size, column D	3

## Sheet: FIGS1E
				% DAF-16 distribution
	Strongly nuclear			Weakly nuclear			Cytoplasmic
24 h Control	0	0	0	8.9	13.5	9.6	91.1	86.5	90.4
24h STR	26.7	36.5	24	33.3	27.3	40	40	36.2	36
P value and statistical significance
Test	Chi-square
Chi-square, df	62.22, 2
P value	<0.001
P value summary	***
One- or two-sided	NA
Statistically significant (P < 0.05)?	Yes
Data analyzed
Number of rows	2
Number of columns	3
