# Supplementary material for: Indole produced during dysbiosis mediates host–microorganism chemical communication
Source: eLife. 2023 Nov 21;12:e85362. doi: 10.7554/eLife.85362 (PMC10691800; doi:10.7554/eLife.85362)
Supplement: Figure 1—source data 1. [file elife-85362-fig1-data1.xlsx]

## Sheet: FIG1B
					% DAF-16 distribution
		Strongly nuclear			Weakly nuclear			Cytoplasmic
Day 1	OP50	0	0	0	8	6	7.5	92	94	92.5
	HK OP50	0	0	0	5	9	8	95	91	92
Day 4	OP50	0	0	0	44	40	52	56	60	48
	HK OP50	0	0	0	7	3	6	93	97	94
Day 7	OP50	17.5	10	21	29.8	35	27	52.7	55	52
	HK OP50	0	0	0	10	15	7	90	85	93
OP50
Day 4							Day 7
P value and statistical significance							P value and statistical significance
Test	Chi-square						Test	Chi-square
Chi-square, df	37.53, 1						Chi-square, df	42.12, 2
z	6.126						P value	<0.001
P value	<0.001						P value summary	***
P value summary	***						One- or two-sided	NA
One- or two-sided	Two-sided						Statistically significant (P < 0.05)?	Yes
Statistically significant (P < 0.05)?	Yes
							Data analyzed
Data analyzed	Weakly nuclear	Cytoplasmic	Total				Number of rows	2
Day 1	7	93	100				Number of columns	3
Day 4	45	55	100
Total	52	148	200
Percentage of row total	Weakly nuclear	Cytoplasmic
Day 1	7.00%	93.00%
Day 4	45.00%	55.00%
Percentage of column total	Weakly nuclear	Cytoplasmic
Day 1	13.46%	62.84%
Day 7	86.54%	37.16%
Percentage of grand total	Weakly nuclear	Cytoplasmic
Day 1	3.50%	46.50%
Day 7	22.50%	27.50%
HK OP50
Day 4							Day 7
P value and statistical significance							P value and statistical significance
Test	Chi-square						Test	Chi-square
Chi-square, df	0.3546, 1						Chi-square, df	0.9768, 1
z	0.5955						z	0.9883
P value	0.5515						P value	0.323
P value summary	ns						P value summary	ns
One- or two-sided	Two-sided						One- or two-sided	Two-sided
Statistically significant (P < 0.05)?	No						Statistically significant (P < 0.05)?	No
Data analyzed	Weak nuclear	Cytoplasmic	Total				Data analyzed	Weak nuclear	Cytoplasmic	Total
Day 1	7	93	100				Day 1	7	93	100
Day 4	5	95	100				Day 7	11	89	100
Total	12	188	200				Total	18	182	200
Percentage of row total	Weak nuclear	Cytoplasmic					Percentage of row total	Weak nuclear	Cytoplasmic
Day 1	7.00%	93.00%					Day 1	7.00%	93.00%
Day 4	5.00%	95.00%					Day 7	11.00%	89.00%
Percentage of column total	Weak nuclear	Cytoplasmic					Percentage of column total	Weak nuclear	Cytoplasmic
Day 1	58.33%	49.47%					Day 1	38.89%	51.10%
Day 4	41.67%	50.53%					Day 7	61.11%	48.90%
Percentage of grand total	Weak nuclear	Cytoplasmic					Percentage of grand total	Weak nuclear	Cytoplasmic
Day 1	3.50%	46.50%					Day 1	3.50%	46.50%
Day 4	2.50%	47.50%					Day 7	5.50%	44.50%

## Sheet: FIG1C
					% DAF-16 distribution
		Strongly nuclear			Weakly nuclear			Cytoplasmic
Day 1	AmpR-OP50 + A+	0	0	0	11	4	12.7	89	96	87.3
	OP50 + A+	0	0	0	12.2	9	8	87.8	91	92
Day 4	AmpR-OP50 + A+	0	0	0	44	36	32	56	64	68
	OP50 + A+	0	0	0	15	12	6	85	88	94
Day 7	AmpR-OP50 + A+	13.3	8	9.6	38.5	44.4	30	48.2	47.6	60.4
	OP50 + A+	0	0	0	10	17.7	20	90	82.3	80
AmpR-OP50 + A+
Day 4							Day 7
P value and statistical significance							P value and statistical significance
Test	Chi-square						Test	Chi-square
Chi-square, df	22.13, 1						Chi-square, df	38.53, 2
z	4.705						P value	<0.001
P value	<0.001						P value summary	***
P value summary	***						One- or two-sided	NA
One- or two-sided	Two-sided						Statistically significant (P < 0.05)?	Yes
Statistically significant (P < 0.05)?	Yes
							Data analyzed
Data analyzed	Weak nuclear	Cytoplasmic	Total				Number of rows	2
Day 1	9	91	100				Number of columns	3
Day 4	37	63	100
Total	46	154	200
Percentage of row total	Weak nuclear	Cytoplasmic
Day 1	9.00%	91.00%
Day 4	37.00%	63.00%
Percentage of column total	Weak nuclear	Cytoplasmic
Day 1	19.57%	59.09%
Day 4	80.43%	40.91%
Percentage of grand total	Weak nuclear	Cytoplasmic
Day 1	4.50%	45.50%
Day 4	18.50%	31.50%
OP50 + A+
Day 4							Day 7
P value and statistical significance							P value and statistical significance
Test	Chi-square						Test	Chi-square
Chi-square, df	0.05321, 1						Chi-square, df	1.592, 1
z	0.2307						z	1.262
P value	0.82						P value	0.21
P value summary	ns						P value summary	ns
One- or two-sided	Two-sided						One- or two-sided	Two-sided
Statistically significant (P < 0.05)?	No						Statistically significant (P < 0.05)?	No
Data analyzed	Weak nuclear	Cytoplasmic	Total				Data analyzed	Weak nuclear	Cytoplasmic	Total
Day 1	10	90	100				Day 1	10	90	100
Day 4	11	89	100				Day 7	16	84	100
Total	21	179	200				Total	26	174	200
Percentage of row total	Weak nuclear	Cytoplasmic					Percentage of row total	Weak nuclear	Cytoplasmic
Day 1	10.00%	90.00%					Day 1	10.00%	90.00%
Day 4	11.00%	89.00%					Day 7	16.00%	84.00%
Percentage of column total	Weak nuclear	Cytoplasmic					Percentage of column total	Weak nuclear	Cytoplasmic
Day 1	47.62%	50.28%					Day 1	38.46%	51.72%
Day 4	52.38%	49.72%					Day 7	61.54%	48.28%
Percentage of grand total	Weak nuclear	Cytoplasmic					Percentage of grand total	Weak nuclear	Cytoplasmic
Day 1	5.00%	45.00%					Day 1	5.00%	45.00%
Day 4	5.50%	44.50%					Day 7	8.00%	42.00%

## Sheet: FIG1D
Days	Percent survival
	WT		daf-16(mu86)
	OP50	HK OP50	OP50	HK OP50
0	100	100	100	100
5			95.2381
7	95.2381		85.7143	95.2381
10	85.7143	94.7368	66.6667	90.4762
12	76.1905	89.4737	47.619
14	71.4286		23.8095	85.7143
17	57.1429	84.2105	4.7619	80.9524
20	38.0952	68.4211	0	66.6667
22	28.5714	57.8947		57.1429
24	23.8095	52.6316		42.8571
26	14.2857	42.1053		23.8095
28	0	31.5789		14.2857
31		21.0526		9.52381
33		10.5263		0
35		0
	OP50				HK OP50
WT vs daf-16(mu86)				WT vs daf-16(mu86)
Comparison of Survival Curves				Comparison of Survival Curves
Log-rank (Mantel-Cox) test				Log-rank (Mantel-Cox) test
Chi square	14.45			Chi square	1.58
df	1			df	1
P value	0.0001			P value	0.2088
P value summary	***			P value summary	ns
Are the survival curves sig different?	Yes			Are the survival curves sig different?	No
Median survival				Median survival
WT OP50	20			WT HK OP50	26
daf-16(mu86) OP50	12			daf-16(mu86) HK OP50	24
Ratio (and its reciprocal)	1.667	0.6		Ratio (and its reciprocal)	1.083	0.9231
95% CI of ratio	0.9102 to 3.052	0.3277 to 1.099		95% CI of ratio	0.5824 to 2.015	0.4963 to 1.717
Hazard Ratio (Mantel-Haenszel)	A/C	C/A		Hazard Ratio (Mantel-Haenszel)	B/D	D/B
Ratio (and its reciprocal)	0.2053	4.871		Ratio (and its reciprocal)	0.6295	1.589
95% CI of ratio	0.09076 to 0.4645	2.153 to 11.02		95% CI of ratio	0.3059 to 1.295	0.7719 to 3.269
Hazard Ratio (logrank)	A/C	C/A		Hazard Ratio (logrank)	B/D	D/B
Ratio (and its reciprocal)	0.3941	2.537		Ratio (and its reciprocal)	0.7099	1.409
95% CI of ratio	0.2013 to 0.7714	1.296 to 4.967		95% CI of ratio	0.3802 to 1.325	0.7545 to 2.630

## Sheet: FIG1E
Days	Percent survival
	WT		daf-16(mu86)
	AmpR-OP50 + A+	OP50 + A+	AmpR-OP50 + A+	OP50 + A+
0	100	100	100	100
5	97.619		95.122
8	92.8571	96.875	85.3659	92.8571
11	83.3333	87.5	65.8537	89.2857
14	66.6667	78.125	43.9024	85.7143
17	47.619	71.875	19.5122	75
20	30.9524	56.25	2.43902	60.7143
23	14.2857	40.625	0	35.7143
26	0	18.75		14.2857
29		0		0
	AmpR-OP50 + A+				OP50 + A+
WT vs daf-16(mu86)				WT vs daf-16(mu86)
Log-rank (Mantel-Cox) test				Log-rank (Mantel-Cox) test
Chi square	12.64			Chi square	0.04863
df	1			df	1
P value	<0.001			P value	0.83
P value summary	***			P value summary	ns
Are the survival curves sig different?	Yes			Are the survival curves sig different?	No
Median survival				Median survival
WT	17			WT	23
daf-16	14			daf-16	23
Ratio (and its reciprocal)	1.214	0.8235		Ratio (and its reciprocal)	1	1
95% CI of ratio	0.7897 to 1.867	0.5355 to 1.266		95% CI of ratio	0.6022 to 1.661	0.6022 to 1.661
Hazard Ratio (Mantel-Haenszel)	A/B	B/A		Hazard Ratio (Mantel-Haenszel)	A/B	B/A
Ratio (and its reciprocal)	0.3589	2.786		Ratio (and its reciprocal)	0.9293	1.076
95% CI of ratio	0.2040 to 0.6314	1.584 to 4.902		95% CI of ratio	0.4845 to 1.783	0.5609 to 2.064
Hazard Ratio (logrank)	A/B	B/A		Hazard Ratio (logrank)	A/B	B/A
Ratio (and its reciprocal)	0.5404	1.85		Ratio (and its reciprocal)	0.9565	1.046
95% CI of ratio	0.3438 to 0.8497	1.177 to 2.909		95% CI of ratio	0.5755 to 1.590	0.6290 to 1.738

## Sheet: FIG1F
Pharyngeal pumping / 30s
Day 1				Day 7
OP50		HK OP50		OP50		HK OP50
WT	daf-16(mu86)	WT	daf-16(mu86)	WT	daf-16(mu86)	WT	daf-16(mu86)
108	105	126	90	83	53	89	118
120	125	116	117	87	54	118	85
131	97	104	122	99	64	100	84
102	126	118	119	56	41	90	90
118	122	111	129	65	55	110	92
Day 7			Day 7
OP50			HK OP50
Column F	daf-16(mu86)		Column H	daf-16(mu86)
vs.	vs.		vs.	vs.
Column E	WT		Column G	WT
Unpaired t test			Unpaired t test
P value	0.0208		P value	0.3922
P value summary	*		P value summary	ns
Significantly different (P < 0.05)?	Yes		Significantly different (P < 0.05)?	No
One- or two-tailed P value?	Two-tailed		One- or two-tailed P value?	Two-tailed
t, df	t=2.870, df=8		t, df	t=0.9045, df=8
How big is the difference?			How big is the difference?
Mean of column E	78		Mean of column G	101.4
Mean of column F	53.4		Mean of column H	93.8
Difference between means (F - E) ± SEM	-24.60 ± 8.571		Difference between means (H - G) ± SEM	-7.600 ± 8.402
95% confidence interval	-44.36 to -4.836		95% confidence interval	-26.98 to 11.78
R squared (eta squared)	0.5073		R squared (eta squared)	0.09278
F test to compare variances			F test to compare variances
F, DFn, Dfd	4.458, 4, 4		F, DFn, Dfd	1.223, 4, 4
P value	0.1768		P value	0.8501
P value summary	ns		P value summary	ns
Significantly different (P < 0.05)?	No		Significantly different (P < 0.05)?	No
Data analyzed			Data analyzed
Sample size, column E	5		Sample size, column G	5
Sample size, column F	5		Sample size, column H	5

## Sheet: FIG1G
Body bending / 30s
Day 1				Day 7
OP50		HK OP50		OP50		HK OP50
WT	daf-16(mu86)	WT	daf-16(mu86)	WT	daf-16(mu86)	WT	daf-16(mu86)
60	44	50	34	35	24	48	41
49	35	49	55	55	34	55	49
58	53	58	53	45	39	56	48
56	56	56	56	46	32	50	53
58	53	58	53	45	39	47	52
Day 7			Day 7
OP50			HK OP50
Column F	daf-16(mu86)		Column H	daf-16(mu86)
vs.	vs.		vs.	vs.
Column E	WT		Column G	WT
Unpaired t test			Unpaired t test
P value	0.0248		P value	0.3791
P value summary	*		P value summary	ns
Significantly different (P < 0.05)?	Yes		Significantly different (P < 0.05)?	No
One- or two-tailed P value?	Two-tailed		One- or two-tailed P value?	Two-tailed
t, df	t=2.757, df=8		t, df	t=0.9309, df=8
How big is the difference?			How big is the difference?
Mean of column E	45.2		Mean of column G	51.2
Mean of column F	33.6		Mean of column H	48.6
Difference between means (F - E) ± SEM	-11.60 ± 4.207		Difference between means (H - G) ± SEM	-2.600 ± 2.793
95% confidence interval	-21.30 to -1.898		95% confidence interval	-9.040 to 3.840
R squared (eta squared)	0.4873		R squared (eta squared)	0.09774
F test to compare variances			F test to compare variances
F, DFn, Dfd	1.311, 4, 4		F, DFn, Dfd	1.335, 4, 4
P value	0.7995		P value	0.7861
P value summary	ns		P value summary	ns
Significantly different (P < 0.05)?	No		Significantly different (P < 0.05)?	No
Data analyzed			Data analyzed
Sample size, column E	5		Sample size, column G	5
Sample size, column F	5		Sample size, column H	5

## Sheet: FIG1I
						% Animals with body-cavity leakage
Day 1				Day 4				Day 7				Day 10
OP50		HK OP50		OP50		HK OP50		OP50		HK OP50		OP50		HK OP50
WT	daf-16(mu86)	WT	daf-16(mu86)	WT	daf-16(mu86)	WT	daf-16(mu86)	WT	daf-16(mu86)	WT	daf-16(mu86)	WT	daf-16(mu86)	WT	daf-16(mu86)
6	7.5	6.11	7.21	10	21	10.58	6.6	9.3	32	13.6	22	25.4	63	10	21
10.4	11.7	10.8	8.3	14.5	16.2	10.6	7.8	12.8	35.6	19.3	21.8	30.4	64.7	14.5	16.2
4.2	8.7	4.41	3.38	16.9	9.2	4.54	3.92	15.6	49.5	8.7	15.2	38.9	71.1	16.9	19.2
9.4	9.52	11.8	9.9	6	7.84	11.53	12.5	16.7	36.6	10.8	14.3	36.6	54.3	19.5	19.4
7.7	5.61	10.1	7.14	10.6	17	4.25	8.51	19	37	8.3	5.6	37	55.6	15.6	17.7
Day 7			Day 7			Day 10			Day 10
OP50			HK OP50			OP50			HK OP50
Column J	daf-16(mu86)		Column L	daf-16(mu86)		Column N	daf-16(mu86)		Column P	daf-16(mu86)
vs.	vs.		vs.	vs.		vs.	vs.		vs.	vs.
Column I	WT		Column K	WT		Column M	WT		Column O	WT
Unpaired t test			Unpaired t test			Unpaired t test			Unpaired t test
P value	0.001		P value	0.3448		P value	0.001		P value	0.0902
P value summary	***		P value summary	ns		P value summary	***		P value summary	ns
Significantly different (P < 0.05)?	Yes		Significantly different (P < 0.05)?	No		Significantly different (P < 0.05)?	Yes		Significantly different (P < 0.05)?	No
One- or two-tailed P value?	Two-tailed		One- or two-tailed P value?	Two-tailed		One- or two-tailed P value?	Two-tailed		One- or two-tailed P value?	Two-tailed
t, df	t=6.874, df=8		t, df	t=1.004, df=8		t, df	t=7.052, df=8		t, df	t=1.926, df=8
How big is the difference?			How big is the difference?			How big is the difference?			How big is the difference?
Mean of column I	14.68		Mean of column K	12.14		Mean of column M	33.66		Mean of column O	15.3
Mean of column J	38.14		Mean of column L	15.78		Mean of column N	61.74		Mean of column P	18.7
Difference between means (J - I) ± SEM	23.46 ± 3.413		Difference between means (L - K) ± SEM	3.640 ± 3.625		Difference between means (N - M) ± SEM	28.08 ± 3.982		Difference between means (P - O) ± SEM	3.400 ± 1.765
95% confidence interval	15.59 to 31.33		95% confidence interval	-4.720 to 12.00		95% confidence interval	18.90 to 37.26		95% confidence interval	-0.6700 to 7.470
R squared (eta squared)	0.8552		R squared (eta squared)	0.1119		R squared (eta squared)	0.8614		R squared (eta squared)	0.3169
F test to compare variances			F test to compare variances			F test to compare variances			F test to compare variances
F, DFn, Dfd	3.155, 4, 4		F, DFn, Dfd	2.215, 4, 4		F, DFn, Dfd	1.515, 4, 4		F, DFn, Dfd	3.691, 4, 4
P value	0.2918		P value	0.4602		P value	0.6973		P value	0.2339
P value summary	ns		P value summary	ns		P value summary	ns		P value summary	ns
Significantly different (P < 0.05)?	No		Significantly different (P < 0.05)?	No		Significantly different (P < 0.05)?	No		Significantly different (P < 0.05)?	No
Data analyzed			Data analyzed			Data analyzed			Data analyzed
Sample size, column I	5		Sample size, column K	5		Sample size, column M	5		Sample size, column O	5
Sample size, column J	5		Sample size, column L	5		Sample size, column N	5		Sample size, column P	5
