# Supplementary material for: Indole produced during dysbiosis mediates host–microorganism chemical communication
Source: eLife. 2023 Nov 21;12:e85362. doi: 10.7554/eLife.85362 (PMC10691800; doi:10.7554/eLife.85362)
Supplement: Figure 2—figure supplement 2—source data 1. [file elife-85362-fig2-figsupp2-data1.xlsx]

## Sheet: FIGS3A
Relative florenscence (%) of dod-3p::gfp
24 h DMSO	24 h 50 μM	24 h 100 μM	24 h 200 μM
100	146.682	247.846	265.153
100	166.316	259.988	315.427
100	232.768	266.667	298.305
50 μM Indole vs DMSO				100 μM Indole vs DMSO				200 μM Indole vs DMSO
Column B	24 h 50 μM			Column C	24 h 100 μM			Column D	24 h 200 μM
vs.	vs.			vs.	vs.			vs.	vs.
Column A	24 h DMSO			Column A	24 h DMSO			Column A	24 h DMSO
Unpaired t test				Unpaired t test				Unpaired t test
P value	0.0347			P value	<0.001			P value	0.0002
P value summary	*			P value summary	***			P value summary	***
Significantly different (P < 0.05)?	Yes			Significantly different (P < 0.05)?	Yes			Significantly different (P < 0.05)?	Yes
One- or two-tailed P value?	Two-tailed			One- or two-tailed P value?	Two-tailed			One- or two-tailed P value?	Two-tailed
t, df	t=3.145, df=4			t, df	t=28.71, df=4			t, df	t=13.08, df=4
How big is the difference?				How big is the difference?				How big is the difference?
Mean of column A	100			Mean of column A	100			Mean of column A	100
Mean of column B	181.9			Mean of column C	258.2			Mean of column D	293
Difference between means (B - A) ± SEM	81.92 ± 26.05			Difference between means (C - A) ± SEM	158.2 ± 5.509			Difference between means (D - A) ± SEM	193.0 ± 14.76
95% confidence interval	9.604 to 154.2			95% confidence interval	142.9 to 173.5			95% confidence interval	152.0 to 233.9
R squared (eta squared)	0.7121			R squared (eta squared)	0.9952			R squared (eta squared)	0.9771
F test to compare variances				F test to compare variances				F test to compare variances
F, DFn, Dfd	Infinity, 2, 2			F, DFn, Dfd	Infinity, 2, 2			F, DFn, Dfd	Infinity, 2, 2
P value	<0.001			P value	<0.001			P value	<0.001
P value summary	***			P value summary	***			P value summary	***
Significantly different (P < 0.05)?	Yes			Significantly different (P < 0.05)?	Yes			Significantly different (P < 0.05)?	Yes
Data analyzed				Data analyzed				Data analyzed
Sample size, column A	3			Sample size, column A	3			Sample size, column A	3
Sample size, column B	3			Sample size, column C	3			Sample size, column D	3

## Sheet: FIGS3B
Relative florenscence (%) of hsp-16.2p::nCherry
24 h DMSO	24 h 50 μM	24 h 100 μM	24 h 200 μM
100	169.188	362.059	204.99
100	314.286	238.095	335.714
100	212.048	212.048	263.855
50 μM Indole vs DMSO				100 μM Indole vs DMSO				200 μM Indole vs DMSO
Column B	24 h 50 μM			Column C	24 h 100 μM			Column D	24 h 200 μM
vs.	vs.			vs.	vs.			vs.	vs.
Column A	24 h DMSO			Column A	24 h DMSO			Column A	24 h DMSO
Unpaired t test				Unpaired t test				Unpaired t test
P value	0.0375			P value	0.021			P value	0.0113
P value summary	*			P value summary	*			P value summary	*
Significantly different (P < 0.05)?	Yes			Significantly different (P < 0.05)?	Yes			Significantly different (P < 0.05)?	Yes
One- or two-tailed P value?	Two-tailed			One- or two-tailed P value?	Two-tailed			One- or two-tailed P value?	Two-tailed
t, df	t=3.063, df=4			t, df	t=3.689, df=4			t, df	t=4.450, df=4
How big is the difference?				How big is the difference?				How big is the difference?
Mean of column A	100			Mean of column A	100			Mean of column A	100
Mean of column B	231.8			Mean of column C	270.7			Mean of column D	268.2
Difference between means (B - A) ± SEM	131.8 ± 43.04			Difference between means (C - A) ± SEM	170.7 ± 46.28			Difference between means (D - A) ± SEM	168.2 ± 37.80
95% confidence interval	12.34 to 251.3			95% confidence interval	42.25 to 299.2			95% confidence interval	63.24 to 273.1
R squared (eta squared)	0.7011			R squared (eta squared)	0.7729			R squared (eta squared)	0.8319
F test to compare variances				F test to compare variances				F test to compare variances
F, DFn, Dfd	Infinity, 2, 2			F, DFn, Dfd	Infinity, 2, 2			F, DFn, Dfd	Infinity, 2, 2
P value	<0.001			P value	<0.001			P value	<0.001
P value summary	***			P value summary	***			P value summary	***
Significantly different (P < 0.05)?	Yes			Significantly different (P < 0.05)?	Yes			Significantly different (P < 0.05)?	Yes
Data analyzed				Data analyzed				Data analyzed
Sample size, column A	3			Sample size, column A	3			Sample size, column A	3
Sample size, column B	3			Sample size, column C	3			Sample size, column D	3
