# Supplementary material for: Indole produced during dysbiosis mediates host–microorganism chemical communication
Source: eLife. 2023 Nov 21;12:e85362. doi: 10.7554/eLife.85362 (PMC10691800; doi:10.7554/eLife.85362)
Supplement: Figure 2—figure supplement 3—source data 1. [file elife-85362-fig2-figsupp3-data1.xlsx]

## Sheet: FIGS4A
	HK OP50
Concentration of indole in worms (μmol/g)
Day 1	Day 4	Day 7
28.6034	34.8962	36.641
28.2355	24.8473	29.8167
27.7235	34.9317	41.918
Day 4			Day 7
Column B	Day 4		Column C	Day 7
vs.	vs.		vs.	vs.
Column A	Day 1		Column A	Day 1
Unpaired t test			Unpaired t test
P value	0.3732		P value	0.0867
P value summary	ns		P value summary	ns
Significantly different (P < 0.05)?	No		Significantly different (P < 0.05)?	No
One- or two-tailed P value?	Two-tailed		One- or two-tailed P value?	Two-tailed
t, df	t=1.002, df=4		t, df	t=2.260, df=4
How big is the difference?			How big is the difference?
Mean of column A	28.19		Mean of column A	28.19
Mean of column B	31.56		Mean of column C	36.13
Difference between means (B - A) ± SEM	3.371 ± 3.365		Difference between means (C - A) ± SEM	7.938 ± 3.512
95% confidence interval	-5.973 to 12.71		95% confidence interval	-1.813 to 17.69
R squared (eta squared)	0.2005		R squared (eta squared)	0.5608
F test to compare variances			F test to compare variances
F, DFn, Dfd	173.0, 2, 2		F, DFn, Dfd	188.5, 2, 2
P value	0.0115		P value	0.0106
P value summary	*		P value summary	*
Significantly different (P < 0.05)?	Yes		Significantly different (P < 0.05)?	Yes
Data analyzed			Data analyzed
Sample size, column A	3		Sample size, column A	3
Sample size, column B	3		Sample size, column C	3

## Sheet: FIGS4B
Concentration of indole in worms (μmol/g)
DMSO	50 μM indole	100 μM Indole	200 μM Indole
27.8854	53.5723	67.82	88.5336
27.4996	51.4965	67.0164	91.9856
29.1774	49.5316	70.2084	92.6933
50 μM Indole vs DMSO				100 μM Indole vs DMSO				200 μM Indole vs DMSO
Column B	50 μM indole			Column C	100 μM Indole			Column D	200 μM Indole
vs.	vs.			vs.	vs.			vs.	vs.
Column A	DMSO			Column A	DMSO			Column A	DMSO
Unpaired t test				Unpaired t test				Unpaired t test
P value	<0.001			P value	<0.001			P value	<0.001
P value summary	***			P value summary	***			P value summary	***
Significantly different (P < 0.05)?	Yes			Significantly different (P < 0.05)?	Yes			Significantly different (P < 0.05)?	Yes
One- or two-tailed P value?	Two-tailed			One- or two-tailed P value?	Two-tailed			One- or two-tailed P value?	Two-tailed
t, df	t=18.35, df=4			t, df	t=37.03, df=4			t, df	t=45.52, df=4
How big is the difference?				How big is the difference?				How big is the difference?
Mean of column A	28.19			Mean of column A	28.19			Mean of column A	28.19
Mean of column B	51.53			Mean of column C	68.35			Mean of column D	91.07
Difference between means (B - A) ± SEM	23.35 ± 1.272			Difference between means (C - A) ± SEM	40.16 ± 1.085			Difference between means (D - A) ± SEM	62.88 ± 1.381
95% confidence interval	19.81 to 26.88			95% confidence interval	37.15 to 43.17			95% confidence interval	59.05 to 66.72
R squared (eta squared)	0.9883			R squared (eta squared)	0.9971			R squared (eta squared)	0.9981
F test to compare variances				F test to compare variances				F test to compare variances
F, DFn, Dfd	5.287, 2, 2			F, DFn, Dfd	3.570, 2, 2			F, DFn, Dfd	6.415, 2, 2
P value	0.3181			P value	0.4377			P value	0.2697
P value summary	ns			P value summary	ns			P value summary	ns
Significantly different (P < 0.05)?	No			Significantly different (P < 0.05)?	No			Significantly different (P < 0.05)?	No
Data analyzed				Data analyzed				Data analyzed
Sample size, column A	3			Sample size, column A	3			Sample size, column A	3
Sample size, column B	3			Sample size, column C	3			Sample size, column D	3
