# Supplementary material for: Indole produced during dysbiosis mediates host–microorganism chemical communication
Source: eLife. 2023 Nov 21;12:e85362. doi: 10.7554/eLife.85362 (PMC10691800; doi:10.7554/eLife.85362)
Supplement: Figure 2—figure supplement 4—source data 1. [file elife-85362-fig2-figsupp4-data1.xlsx]

## Sheet: FIGS5A
Relative mRNA level of tnaA
K12	ΔtnaA
0.997692	0
0.950439	0
1.05458	0

## Sheet: FIGS5B
Concentration of indole in E. coli (μmol/L)
K12	ΔtnaA
45.6686	0
41.8279	0
40.0136	0

## Sheet: FIGS5C
				4 day K12 ΔtnaA
				% DAF-16 distribution
	Strongly nuclear			Weakly nuclear			Cytoplasmic
24 h DMSO	0	0	0	11.6	12.5	9.6	88.4	87.5	90.4
24 h Indole	0	5.7	0	32.7	26.4	36.2	67.3	67.9	63.8
P value and statistical significance
Test	Chi-square
Chi-square, df	15.67, 2
P value	<0.001
P value summary	***
One- or two-sided	NA
Statistically significant (P < 0.05)?	Yes
Data analyzed
Number of rows	2
Number of columns	3

## Sheet: FIGS5D
Concentration of indole in E. coli (μmol/L)
K12ΔtnaA	K12 ΔtnaA::tnaA
0	32.931
0	33.7667
0	35.5878

## Sheet: FIGS5E
					% DAF-16 distribution
		Strongly nuclear			Weakly nuclear			Cytoplasmic
Day 1	K12 ΔtnaA	0	0	0	6	4	0	94	96	100
	K12 ΔtnaA::ΔtnaA	0	0	0	7	2	2	93	98	98
Day 4	K12 ΔtnaA	0	0	0	7	12	13	93	88	87
	K12 ΔtnaA::ΔtnaA	4	7	0	31	37	39	65	56	61
Day 7	K12 ΔtnaA	0	0	2	15	17	6	85	83	92
	K12 ΔtnaA::ΔtnaA	0	4	12	37	45	32	63	51	56
Day4							Day7
P value and statistical significance							P value and statistical significance
Test	Chi-square						Test	Chi-square
Chi-square, df	22.94, 2						Chi-square, df	20.80, 2
P value	<0.001						P value	<0.001
P value summary	***						P value summary	***
One- or two-sided	NA						One- or two-sided	NA
Statistically significant (P < 0.05)?	Yes						Statistically significant (P < 0.05)?	Yes
Data analyzed							Data analyzed
Number of rows	2						Number of rows	2
Number of columns	3						Number of columns	3
