# Supplementary material for: Indole produced during dysbiosis mediates host–microorganism chemical communication
Source: eLife. 2023 Nov 21;12:e85362. doi: 10.7554/eLife.85362 (PMC10691800; doi:10.7554/eLife.85362)
Supplement: Figure 2—source data 1. [file elife-85362-fig2-data1.xlsx]

## Sheet: FIG2B
				% DAF-16 distribution
	Strongly nuclear			Weakly nuclear			Cytoplasmic
DMSO	0	0	0	1	3	0	99	97	100
50 μM Indole	3	0	1	24.2	20	27	72.8	80	72
100 μM Indole	0	0	0	30	35	28	70	65	72
200 μM Indole	10	15	7	41	32	35	49	53	58
50 μM Indole vs DMSO							100 μM Indole vs DMSO
P value and statistical significance							P value and statistical significance
Test	Chi-square						Test	Chi-square
Chi-square, df	25.47, 2						Chi-square, df	33.48, 1
P value	<0.001						z	5.786
P value summary	***						P value	<0.001
One- or two-sided	NA						P value summary	***
Statistically significant (P < 0.05)?	Yes						One- or two-sided	Two-sided
							Statistically significant (P < 0.05)?	Yes
Data analyzed
Number of rows	2						Data analyzed	Weak nuclear	Cytoplasmic	Total
Number of columns	3						DMSO	1	99	100
							100 μM Indole	31	69	100
							Total	32	168	200
							Percentage of row total	Weak nuclear	Cytoplasmic
							DMSO	1.00%	99.00%
							100 μM Indole	31.00%	69.00%
							Percentage of column total	Weak nuclear	Cytoplasmic
							DMSO	3.13%	58.93%
							100 μM Indole	96.88%	41.07%
							Percentage of grand total	Weak nuclear	Cytoplasmic
							DMSO	0.50%	49.50%
							50 μM Indole	15.50%	34.50%
200 μM Indole vs DMSO
P value and statistical significance
Test	Chi-square
Chi-square, df	58.03, 2
P value	<0.001
P value summary	***
One- or two-sided	NA
Statistically significant (P < 0.05)?	Yes
Data analyzed
Number of rows	2
Number of columns	3

## Sheet: FIG2C
CFU per worm (log10)				Concentration of indole in worms (nmol/g)
Day 1	Day 4	Day 7		Day 1	Day 4	Day 7
0.7	1.5	3.2		31.8691	65.1257	95.0002
0.1	2.2	3.1		28.6843	68.216	107.601
0.9	2.7	3.7		32.0513	82.301	115.132
CFU per worm (log10)						Concentration of indole in worms (nmol/g)
Column B	Day 4		Column C	Day 7		Column F	Day 4		Column G	Day 7
vs.	vs.		vs.	vs.		vs.	vs.		vs.	vs.
Column A	Day 1		Column A	Day 1		Column E	Day 1		Column E	Day 1
Unpaired t test			Unpaired t test			Unpaired t test			Unpaired t test
P value	0.0208		P value	0.0008		P value	0.0016		P value	0.0002
P value summary	*		P value summary	***		P value summary	**		P value summary	***
Significantly different (P < 0.05)?	Yes		Significantly different (P < 0.05)?	Yes		Significantly different (P < 0.05)?	Yes		Significantly different (P < 0.05)?	Yes
One- or two-tailed P value?	Two-tailed		One- or two-tailed P value?	Two-tailed		One- or two-tailed P value?	Two-tailed		One- or two-tailed P value?	Two-tailed
t, df	t=3.704, df=4		t, df	t=9.110, df=4		t, df	t=7.598, df=4		t, df	t=12.56, df=4
How big is the difference?			How big is the difference?			How big is the difference?			How big is the difference?
Mean of column A	0.5667		Mean of column A	0.5667		Mean of column E	30.87		Mean of column E	30.87
Mean of column B	2.133		Mean of column C	3.333		Mean of column F	71.88		Mean of column G	105.9
Difference between means (B - A) ± SEM	1.567 ± 0.4230		Difference between means (C - A) ± SEM	2.767 ± 0.3037		Difference between means (B - A) ± SEM	41.01 ± 5.398		Difference between means (C - A) ± SEM	75.04 ± 5.974
95% confidence interval	0.3924 to 2.741		95% confidence interval	1.924 to 3.610		95% confidence interval	26.03 to 56.00		95% confidence interval	58.46 to 91.63
R squared (eta squared)	0.7743		R squared (eta squared)	0.954		R squared (eta squared)	0.9352		R squared (eta squared)	0.9753
F test to compare variances			F test to compare variances			F test to compare variances			F test to compare variances
F, DFn, Dfd	2.096, 2, 2		F, DFn, Dfd	1.677, 2, 2		F, DFn, Dfd	23.38, 2, 2		F, DFn, Dfd	28.86, 2, 2
P value	0.646		P value	0.747		P value	0.082		P value	0.067
P value summary	ns		P value summary	ns		P value summary	ns		P value summary	ns
Significantly different (P < 0.05)?	No		Significantly different (P < 0.05)?	No		Significantly different (P < 0.05)?	No		Significantly different (P < 0.05)?	No
Data analyzed			Data analyzed			Data analyzed			Data analyzed
Sample size, column A	3		Sample size, column A	3		Sample size, column A	3		Sample size, column A	3
Sample size, column B	3		Sample size, column C	3		Sample size, column B	3		Sample size, column C	3

## Sheet: FIG2D
					% DAF-16 distribution
		Strongly nuclear			Weakly nuclear			Cytoplasmic
Day 1	K12	0	0	0	5	5	8	95	95	92
	K12 △tnaA	0	0	0	5	6	7	95	94	93
Day 4	K12	3.5	5	5.5	36	35	38	61.5	60	56.5
	K12 △tnaA	0	0	0	13	12	11	87	88	89
Day 7	K12	15.5	21	12	28.8	28	35	55.7	51	53
	K12 △tnaA	0	0	0	10	12	10	90	88	90
Day 4							Day 7
P value and statistical significance							P value and statistical significance
Test	Chi-square						Test	Chi-square
Chi-square, df	22.72, 2						Chi-square, df	34.65, 2
P value	<0.001						P value	<0.001
P value summary	***						P value summary	***
One- or two-sided	NA						One- or two-sided	NA
Statistically significant (P < 0.05)?	Yes						Statistically significant (P < 0.05)?	Yes
Data analyzed							Data analyzed
Number of rows	2						Number of rows	2
Number of columns	3						Number of columns	3
