# Supplementary material for: Indole produced during dysbiosis mediates host–microorganism chemical communication
Source: eLife. 2023 Nov 21;12:e85362. doi: 10.7554/eLife.85362 (PMC10691800; doi:10.7554/eLife.85362)
Supplement: Figure 3—source data 1. [file elife-85362-fig3-data1.xlsx]

## Sheet: FIG3A
		WT
Days	Percent survival
	K12 DMSO	K12 Indole	K12 ΔtnaA DMSO	K12 ΔtnaA Indole
0	100	100	100	100
5	93.3333	97.6744	92.6829	90.9091
8	86.6667	95.3488	75.6098	84.0909
11	80	88.3721	56.0976	75
14	64.4444	79.0698	26.8293	61.3636
17	46.6667	62.7907	14.6341	45.4545
20	31.1111	46.5116	7.31707	27.2727
23	15.5556	32.5581	0	15.9091
26	6.66667	23.2558		6.81818
29	0	13.9535		2.27273
32		6.97674		0
35		0
K12				DMSO				K12 ΔtnaA
DMSO vs Indole				K12 vs K12 ΔtnaA				DMSO vs Indole
Comparison of Survival Curves				Comparison of Survival Curves				Comparison of Survival Curves
Log-rank (Mantel-Cox) test				Log-rank (Mantel-Cox) test				Log-rank (Mantel-Cox) test
Chi square	6.746			Chi square	14.55			Chi square	11.71
df	1			df	1			df	1
P value	0.0094			P value	0.0001			P value	0.0006
P value summary	**			P value summary	***			P value summary	***
Are the survival curves sig different?	Yes			Are the survival curves sig different?	Yes			Are the survival curves sig different?	Yes
Median survival				Median survival				Median survival
K12 DMSO	17			K12 DMSO	17			K12 ΔtnaA DMSO	14
K12 Indole	20			K12 ΔtnaA DMSO	14			K12 ΔtnaA Indole	17
Ratio (and its reciprocal)	0.85	1.176		Ratio (and its reciprocal)	1.214	0.8235		Ratio (and its reciprocal)	0.8235	1.214
95% CI of ratio	0.5596 to 1.291	0.7746 to 1.787		95% CI of ratio	0.7953 to 1.854	0.5394 to 1.257		95% CI of ratio	0.5382 to 1.260	0.7935 to 1.858
Hazard Ratio (Mantel-Haenszel)	A/B	B/A		Hazard Ratio (Mantel-Haenszel)	A/C	C/A		Hazard Ratio (Mantel-Haenszel)	C/D	D/C
Ratio (and its reciprocal)	1.962	0.5098		Ratio (and its reciprocal)	0.3417	2.927		Ratio (and its reciprocal)	2.595	0.3853
95% CI of ratio	1.180 to 3.261	0.3066 to 0.8476		95% CI of ratio	0.1968 to 0.5932	1.686 to 5.082		95% CI of ratio	1.503 to 4.481	0.2232 to 0.6654
Hazard Ratio (logrank)	A/B	B/A		Hazard Ratio (logrank)	A/C	C/A		Hazard Ratio (logrank)	C/D	D/C
Ratio (and its reciprocal)	1.586	0.6306		Ratio (and its reciprocal)	0.5146	1.943		Ratio (and its reciprocal)	1.826	0.5478
95% CI of ratio	1.035 to 2.430	0.4115 to 0.9665		95% CI of ratio	0.3270 to 0.8098	1.235 to 3.058		95% CI of ratio	1.165 to 2.862	0.3495 to 0.8586

## Sheet: FIG3B
		daf-16 (mu86)
Days	Percent survival
	K12 DMSO	K12 Indole	K12 ΔtnaA DMSO	K12 ΔtnaA Indole
0	100	100	100	100
5	97.7273	93.4783	95.5556	93.1818
8	84.0909	86.9565	86.6667	81.8182
11	65.9091	65.2174	66.6667	63.6364
14	38.6364	34.7826	44.4444	36.3636
17	18.1818	21.7391	22.2222	20.4545
20	9.09091	10.8696	8.88889	6.81818
23	4.54545	2.17391	4.44444	2.27273
26	0	0	0	0
K12				DMSO				K12 ΔtnaA
DMSO vs Indole				K12 vs K12 ΔtnaA				DMSO vs Indole
Comparison of Survival Curves				Comparison of Survival Curves				Comparison of Survival Curves
Log-rank (Mantel-Cox) test				Log-rank (Mantel-Cox) test				Log-rank (Mantel-Cox) test
Chi square	0.005529			Chi square	0.1128			Chi square	0.413
df	1			df	1			df	1
P value	0.9407			P value	0.7369			P value	0.5204
P value summary	ns			P value summary	ns			P value summary	ns
Are the survival curves sig different?	No			Are the survival curves sig different?	No			Are the survival curves sig different?	No
Median survival				Median survival				Median survival
K12 DMSO	14			K12 DMSO	14			K12 ΔtnaA DMSO	14
K12 Indole	14			K12 ΔtnaA DMSO	14			K12 ΔtnaA Indole	14
Ratio (and its reciprocal)	1	1		Ratio (and its reciprocal)	1	1		Ratio (and its reciprocal)	1	1
95% CI of ratio	0.6615 to 1.512	0.6615 to 1.512		95% CI of ratio	0.6600 to 1.515	0.6600 to 1.515		95% CI of ratio	0.6600 to 1.515	0.6600 to 1.515
Hazard Ratio (Mantel-Haenszel)	A/B	B/A		Hazard Ratio (Mantel-Haenszel)	A/C	C/A		Hazard Ratio (Mantel-Haenszel)	C/D	D/C
Ratio (and its reciprocal)	0.9803	1.02		Ratio (and its reciprocal)	1.094	0.9139		Ratio (and its reciprocal)	0.8419	1.188
95% CI of ratio	0.5809 to 1.654	0.6044 to 1.721		95% CI of ratio	0.6470 to 1.851	0.5403 to 1.546		95% CI of ratio	0.4982 to 1.423	0.7028 to 2.007
Hazard Ratio (logrank)	A/B	B/A		Hazard Ratio (logrank)	A/C	C/A		Hazard Ratio (logrank)	C/D	D/C
Ratio (and its reciprocal)	0.9877	1.012		Ratio (and its reciprocal)	1.058	0.9452		Ratio (and its reciprocal)	0.8976	1.114
95% CI of ratio	0.6534 to 1.493	0.6697 to 1.531		95% CI of ratio	0.6980 to 1.603	0.6236 to 1.433		95% CI of ratio	0.5919 to 1.361	0.7347 to 1.690

## Sheet: FIG3C
		WT
CFU per worm (log10)
Day 1		Day 4		Day 7
K12	K12 ΔtnaA	K12	K12 ΔtnaA	K12	K12 ΔtnaA
0.22	0.72	2.7	3.58	3.26	4.5
0.51	0.43	1.38	3.01	3.17	4.7
0.54	0.47	0.82	3.43	3.42	3.82
0.95	0.35	2.63	3.1	3.3	4.1
1.05	0.69	2.82	3.2	3.22	3.45
Day 1			Day 4			Day 7
Column B	K12 ΔtnaA		Column D	K12 ΔtnaA		Column F	K12 ΔtnaA
vs.	vs.		vs.	vs.		vs.	vs.
Column A	K12		Column C	K12		Column E	K12
Unpaired t test			Unpaired t test			Unpaired t test
P value	0.492		P value	0.0218		P value	0.0064
P value summary	ns		P value summary	*		P value summary	**
Significantly different (P < 0.05)?	No		Significantly different (P < 0.05)?	Yes		Significantly different (P < 0.05)?	Yes
One- or two-tailed P value?	Two-tailed		One- or two-tailed P value?	Two-tailed		One- or two-tailed P value?	Two-tailed
t, df	t=0.7200, df=8		t, df	t=2.840, df=8		t, df	t=3.656, df=8
How big is the difference?			How big is the difference?			How big is the difference?
Mean of column A	0.654		Mean of column C	2.07		Mean of column E	3.274
Mean of column B	0.532		Mean of column D	3.264		Mean of column F	4.114
Difference between means (B - A) ± SEM	-0.1220 ± 0.1694		Difference between means (D - C) ± SEM	1.194 ± 0.4204		Difference between means (F - E) ± SEM	0.8400 ± 0.2298
95% confidence interval	-0.5127 to 0.2687		95% confidence interval	0.2246 to 2.163		95% confidence interval	0.3102 to 1.370
R squared (eta squared)	0.06086		R squared (eta squared)	0.5021		R squared (eta squared)	0.6256
F test to compare variances			F test to compare variances			F test to compare variances
F, DFn, Dfd	4.332, 4, 4		F, DFn, Dfd	14.86, 4, 4		F, DFn, Dfd	28.39, 4, 4
P value	0.1846		P value	0.0229		P value	0.0068
P value summary	ns		P value summary	*		P value summary	**
Significantly different (P < 0.05)?	No		Significantly different (P < 0.05)?	Yes		Significantly different (P < 0.05)?	Yes
Data analyzed			Data analyzed			Data analyzed
Sample size, column A	5		Sample size, column C	5		Sample size, column E	5
Sample size, column B	5		Sample size, column D	5		Sample size, column F	5

## Sheet: FIG3D
		daf-16(mu86)
CFU per worm (log10)
Day 1		Day 4		Day 7
K12	K12 ΔtnaA	K12	K12 ΔtnaA	K12	K12 ΔtnaA
1.07	1.02	2.85	3.07	4.75	3.85
0.25	0.46	3.42	3.2	3.63	4.67
0.69	0.49	2.9	2.6	4.23	3.98
0.9	0.57	3.07	3.24	4.26	4.27
0.28	0.77	3.54	3.54	4.36	4.06
Day 1			Day 4			Day 7
Column B	K12 ΔtnaA		Column D	K12 ΔtnaA		Column F	K12 ΔtnaA
vs.	vs.		vs.	vs.		vs.	vs.
Column A	K12		Column C	K12		Column E	K12
Unpaired t test			Unpaired t test			Unpaired t test
P value	0.9048		P value	0.9029		P value	0.7369
P value summary	ns		P value summary	ns		P value summary	ns
Significantly different (P < 0.05)?	No		Significantly different (P < 0.05)?	No		Significantly different (P < 0.05)?	No
One- or two-tailed P value?	Two-tailed		One- or two-tailed P value?	Two-tailed		One- or two-tailed P value?	Two-tailed
t, df	t=0.1235, df=8		t, df	t=0.1259, df=8		t, df	t=0.3479, df=8
How big is the difference?			How big is the difference?			How big is the difference?
Mean of column A	0.638		Mean of column C	3.156		Mean of column E	4.246
Mean of column B	0.662		Mean of column D	3.13		Mean of column F	4.166
Difference between means (B - A) ± SEM	0.02400 ± 0.1943		Difference between means (D - C) ± SEM	-0.02600 ± 0.2066		Difference between means (F - E) ± SEM	-0.08000 ± 0.2299
95% confidence interval	-0.4241 to 0.4721		95% confidence interval	-0.5023 to 0.4503		95% confidence interval	-0.6102 to 0.4502
R squared (eta squared)	0.001903		R squared (eta squared)	0.001977		R squared (eta squared)	0.01491
F test to compare variances			F test to compare variances			F test to compare variances
F, DFn, Dfd	2.454, 4, 4		F, DFn, Dfd	1.224, 4, 4		F, DFn, Dfd	1.576, 4, 4
P value	0.4058		P value	0.8495		P value	0.6702
P value summary	ns		P value summary	ns		P value summary	ns
Significantly different (P < 0.05)?	No		Significantly different (P < 0.05)?	No		Significantly different (P < 0.05)?	No
Data analyzed			Data analyzed			Data analyzed
Sample size, column A	5		Sample size, column C	5		Sample size, column E	5
Sample size, column B	5		Sample size, column D	5		Sample size, column F	5

## Sheet: FIG3F
		WT
	Relative florenscence of mCherry (%)
Day 1		Day 4		Day 7
K12	K12 ΔtnaA	K12	K12 ΔtnaA	K12	K12 ΔtnaA
100	68.75	300	550	837.5	1600
100	112.5	400	537.5	950	2037.5
100	75	262.5	725	650	2400
Day 1			Day 4			Day 7
Column B	K12 ΔtnaA		Column D	K12 ΔtnaA		Column F	K12 ΔtnaA
vs.	vs.		vs.	vs.		vs.	vs.
Column A	K12		Column C	K12		Column E	K12
Unpaired t test			Unpaired t test			Unpaired t test
P value	0.3459		P value	0.0179		P value	0.0083
P value summary	ns		P value summary	*		P value summary	**
Significantly different (P < 0.05)?	No		Significantly different (P < 0.05)?	Yes		Significantly different (P < 0.05)?	Yes
One- or two-tailed P value?	Two-tailed		One- or two-tailed P value?	Two-tailed		One- or two-tailed P value?	Two-tailed
t, df	t=1.067, df=4		t, df	t=3.875, df=4		t, df	t=4.853, df=4
How big is the difference?			How big is the difference?			How big is the difference?
Mean of column A	100		Mean of column C	320.8		Mean of column E	812.5
Mean of column B	85.42		Mean of column D	604.2		Mean of column F	2013
Difference between means (B - A) ± SEM	-14.58 ± 13.66		Difference between means (D - C) ± SEM	283.3 ± 73.12		Difference between means (F - E) ± SEM	1200 ± 247.3
95% confidence interval	-52.51 to 23.35		95% confidence interval	80.31 to 486.4		95% confidence interval	513.4 to 1887
R squared (eta squared)	0.2217		R squared (eta squared)	0.7896		R squared (eta squared)	0.8548
F test to compare variances			F test to compare variances			F test to compare variances
F, DFn, Dfd	Infinity, 2, 2		F, DFn, Dfd	2.175, 2, 2		F, DFn, Dfd	6.986, 2, 2
P value	<0.001		P value	0.6299		P value	0.2504
P value summary	***		P value summary	ns		P value summary	ns
Significantly different (P < 0.05)?	Yes		Significantly different (P < 0.05)?	No		Significantly different (P < 0.05)?	No
Data analyzed			Data analyzed			Data analyzed
Sample size, column A	3		Sample size, column C	3		Sample size, column E	3
Sample size, column B	3		Sample size, column D	3		Sample size, column F	3

## Sheet: FIG3G
		daf-16(mu86)
Relative florenscence of mCherry (%)
Day 1		Day 4		Day 7
K12	K12 ΔtnaA	K12	K12 ΔtnaA	K12	K12 ΔtnaA
137.5	79.125	612.5	812.5	2062.5	2412.5
112.5	100	850	700	2412.5	2612.5
100	87.5	487.5	525	2287.5	2237.5
Day 1			Day 4			Day 7
Column B	K12 ΔtnaA		Column D	K12 ΔtnaA		Column F	K12 ΔtnaA
vs.	vs.		vs.	vs.		vs.	vs.
Column A	K12		Column C	K12		Column E	K12
Unpaired t test			Unpaired t test			Unpaired t test
P value	0.0917		P value	0.8398		P value	0.3262
P value summary	ns		P value summary	ns		P value summary	ns
Significantly different (P < 0.05)?	No		Significantly different (P < 0.05)?	No		Significantly different (P < 0.05)?	No
One- or two-tailed P value?	Two-tailed		One- or two-tailed P value?	Two-tailed		One- or two-tailed P value?	Two-tailed
t, df	t=2.209, df=4		t, df	t=0.2156, df=4		t, df	t=1.118, df=4
How big is the difference?			How big is the difference?			How big is the difference?
Mean of column A	116.7		Mean of column C	650		Mean of column E	2254
Mean of column B	88.88		Mean of column D	679.2		Mean of column F	2421
Difference between means (B - A) ± SEM	-27.79 ± 12.58		Difference between means (D - C) ± SEM	29.17 ± 135.3		Difference between means (F - E) ± SEM	166.7 ± 149.1
95% confidence interval	-62.73 to 7.142		95% confidence interval	-346.4 to 404.7		95% confidence interval	-247.2 to 580.6
R squared (eta squared)	0.5495		R squared (eta squared)	0.01149		R squared (eta squared)	0.2381
F test to compare variances			F test to compare variances			F test to compare variances
F, DFn, Dfd	3.304, 2, 2		F, DFn, Dfd	1.615, 2, 2		F, DFn, Dfd	1.119, 2, 2
P value	0.4647		P value	0.7647		P value	0.9438
P value summary	ns		P value summary	ns		P value summary	ns
Significantly different (P < 0.05)?	No		Significantly different (P < 0.05)?	No		Significantly different (P < 0.05)?	No
Data analyzed			Data analyzed			Data analyzed
Sample size, column A	3		Sample size, column C	3		Sample size, column E	3
Sample size, column B	3		Sample size, column D	3		Sample size, column F	3

## Sheet: FIG3H
		WT
CFU per worm (log10)
Day 1		Day 4		Day 7
DMSO	Indole	DMSO	Indole	DMSO	Indole
0.22	1	1.69	1.1	2.52	1.95
0.74	1.02	2.02	1.27	2.82	2.41
0.82	0.45	2.14	1.11	3.12	2.09
0.96	0.87	2.28	1.07	3.37	1.41
0.26	0.68	1.52	0.46	2.52	1.68
Day 1			Day 4			Day 7
Column B	Indole		Column D	Indole		Column F	Indole
vs.	vs.		vs.	vs.		vs.	vs.
Column A	DMSO		Column C	DMSO		Column E	DMSO
Unpaired t test			Unpaired t test			Unpaired t test
P value	0.3033		P value	0.0016		P value	0.0039
P value summary	ns		P value summary	**		P value summary	**
Significantly different (P < 0.05)?	No		Significantly different (P < 0.05)?	Yes		Significantly different (P < 0.05)?	Yes
One- or two-tailed P value?	Two-tailed		One- or two-tailed P value?	Two-tailed		One- or two-tailed P value?	Two-tailed
t, df	t=1.100, df=8		t, df	t=4.664, df=8		t, df	t=4.017, df=8
How big is the difference?			How big is the difference?			How big is the difference?
Mean of column A	0.6		Mean of column C	1.93		Mean of column E	2.87
Mean of column B	0.804		Mean of column D	1.002		Mean of column F	1.908
Difference between means (B - A) ± SEM	0.2040 ± 0.1854		Difference between means (D - C) ± SEM	-0.9280 ± 0.1990		Difference between means (F - E) ± SEM	-0.9620 ± 0.2395
95% confidence interval	-0.2236 to 0.6316		95% confidence interval	-1.387 to -0.4691		95% confidence interval	-1.514 to -0.4098
R squared (eta squared)	0.1314		R squared (eta squared)	0.7311		R squared (eta squared)	0.6686
F test to compare variances			F test to compare variances			F test to compare variances
F, DFn, Dfd	1.989, 4, 4		F, DFn, Dfd	1.023, 4, 4		F, DFn, Dfd	1.048, 4, 4
P value	0.5219		P value	0.9831		P value	0.9649
P value summary	ns		P value summary	ns		P value summary	ns
Significantly different (P < 0.05)?	No		Significantly different (P < 0.05)?	No		Significantly different (P < 0.05)?	No
Data analyzed			Data analyzed			Data analyzed
Sample size, column A	5		Sample size, column C	5		Sample size, column E	5
Sample size, column B	5		Sample size, column D	5		Sample size, column F	5

## Sheet: FIG3I
		daf-16(mu86)
CFU per worm (log10)
Day 1		Day 4		Day 7
DMSO	Indole	DMSO	Indole	DMSO	Indole
0.19	1.03	3.22	3.3	3.75	3.96
1.09	1.18	3.53	3.57	3.73	4.23
0.82	0.41	3.43	3.55	3.84	3.6
0.47	0.87	3.39	3.17	4.02	4.11
0.98	0.68	3.22	3.3	3.85	3.86
Day 1			Day 4			Day 7
Column B	Indole		Column D	Indole		Column F	Indole
vs.	vs.		vs.	vs.		vs.	vs.
Column A	DMSO		Column C	DMSO		Column E	DMSO
Unpaired t test			Unpaired t test			Unpaired t test
P value	0.5791		P value	0.8448		P value	0.3694
P value summary	ns		P value summary	ns		P value summary	ns
Significantly different (P < 0.05)?	No		Significantly different (P < 0.05)?	No		Significantly different (P < 0.05)?	No
One- or two-tailed P value?	Two-tailed		One- or two-tailed P value?	Two-tailed		One- or two-tailed P value?	Two-tailed
t, df	t=0.5781, df=8		t, df	t=0.2022, df=8		t, df	t=0.9511, df=8
How big is the difference?			How big is the difference?			How big is the difference?
Mean of column A	0.71		Mean of column C	3.358		Mean of column E	3.838
Mean of column B	0.834		Mean of column D	3.378		Mean of column F	3.952
Difference between means (B - A) ± SEM	0.1240 ± 0.2145		Difference between means (D - C) ± SEM	0.02000 ± 0.09893		Difference between means (F - E) ± SEM	0.1140 ± 0.1199
95% confidence interval	-0.3707 to 0.6187		95% confidence interval	-0.2081 to 0.2481		95% confidence interval	-0.1624 to 0.3904
R squared (eta squared)	0.04009		R squared (eta squared)	0.005082		R squared (eta squared)	0.1016
F test to compare variances			F test to compare variances			F test to compare variances
F, DFn, Dfd	1.536, 4, 4		F, DFn, Dfd	1.650, 4, 4		F, DFn, Dfd	4.455, 4, 4
P value	0.6877		P value	0.6396		P value	0.177
P value summary	ns		P value summary	ns		P value summary	ns
Significantly different (P < 0.05)?	No		Significantly different (P < 0.05)?	No		Significantly different (P < 0.05)?	No
Data analyzed			Data analyzed			Data analyzed
Sample size, column A	5		Sample size, column C	5		Sample size, column E	5
Sample size, column B	5		Sample size, column D	5		Sample size, column F	5
