# Supplementary material for: Indole produced during dysbiosis mediates host–microorganism chemical communication
Source: eLife. 2023 Nov 21;12:e85362. doi: 10.7554/eLife.85362 (PMC10691800; doi:10.7554/eLife.85362)
Supplement: Figure 4—figure supplement 1—source data 1. [file elife-85362-fig4-figsupp1-data1.xlsx]

## Sheet: FIGS6A
					Day 7
				% DAF-16 distribution
	Strongly nuclear			Weakly nuclear			Cytoplasmic
EV	0	10	0	56.7	45	42.2	43.3	45	57.8
ahr-1 RNAi	0	0	6	66.5	45	40	34.5	55	54
P value and statistical significance
Test	Chi-square
Chi-square, df	0.3326, 2
P value	0.85
P value summary	ns
One- or two-sided	NA
Statistically significant (P < 0.05)?	No
Data analyzed
Number of rows	2
Number of columns	3

## Sheet: FIGS6B
				% DAF-16 distribution
	Strongly nuclear			Weakly nuclear			Cytoplasmic
24 h EV Indole	9	11	5	56	45	37	35	44	58
24 h ahr-1 RNAi Indole	7	0	5	42	57	48	51	43	47
P value and statistical significance
Test	Chi-square
Chi-square, df	1.439, 2
P value	0.49
P value summary	ns
One- or two-sided	NA
Statistically significant (P < 0.05)?	No
Data analyzed
Number of rows	2
Number of columns	3

## Sheet: FIGS6C
				% DAF-16 distribution
	Strongly nuclear			Weakly nuclear			Cytoplasmic
24 h EV Indole	0	0	5	49	59	48	51	41	47
24 h sgk-1 RNAi Indole	0	6	4	62.5	47	53	37.5	47	43
P value and statistical significance
Test	Chi-square
Chi-square, df	0.3389, 2
P value	0.84
P value summary	ns
One- or two-sided	NA
Statistically significant (P < 0.05)?	No
Data analyzed
Number of rows	2
Number of columns	3
