# Supplementary material for: Indole produced during dysbiosis mediates host–microorganism chemical communication
Source: eLife. 2023 Nov 21;12:e85362. doi: 10.7554/eLife.85362 (PMC10691800; doi:10.7554/eLife.85362)
Supplement: Figure 4—figure supplement 2—source data 1. [file elife-85362-fig4-figsupp2-data1.xlsx]

## Sheet: FIGS7A
	Percent survival
Days	EV DMSO	EV Indole	daf-16 RNAi DMSO	daf-16 RNAi Indole
0	100	100	100	100
5	86.1111	86.4865	86.8421	88.8889
8	75	75.6757	73.6842	75
10	61.1111	62.1622	57.8947	61.1111
13	47.2222	45.9459	44.7368	44.4444
16	27.7778	24.3243	23.6842	25
19	13.8889	13.5135	10.5263	11.1111
21	5.55556	5.40541	2.63158	2.77778
24	0	0	0	0
EV DMSO vs EV Indole					EV DMSO vs daf-16 RNAi DMSO				daf-16 RNAi DMSO vs daf-16 RNAi Indole
Log-rank (Mantel-Cox) test					Log-rank (Mantel-Cox) test				Log-rank (Mantel-Cox) test
Chi square	0.01254				Chi square	0.2401			Chi square	0.01841
df	1				df	1			df	1
P value	0.9108				P value	0.6241			P value	0.8921
P value summary	ns				P value summary	ns			P value summary	ns
Are the survival curves sig different?	No				Are the survival curves sig different?	No			Are the survival curves sig different?	No
Median survival					Median survival				Median survival
EV DMSO	13				EV DMSO	13			daf-16 RNAiDMSO	13
EV Indole	13				daf-16 RNAiDMSO	13			daf-16 RNAiIndole	13
Ratio (and its reciprocal)	1	1			Ratio (and its reciprocal)	1	1		Ratio (and its reciprocal)	1	1
95% CI of ratio	0.6320 to 1.582	0.6320 to 1.582			95% CI of ratio	0.6339 to 1.578	0.6339 to 1.578		95% CI of ratio	0.6339 to 1.578	0.6339 to 1.578
Hazard Ratio (Mantel-Haenszel)	A/B	B/A			Hazard Ratio (Mantel-Haenszel)	A/C	C/A		Hazard Ratio (Mantel-Haenszel)	C/D	D/C
Ratio (and its reciprocal)	0.9685	1.033			Ratio (and its reciprocal)	0.8697	1.15		Ratio (and its reciprocal)	1.04	0.9619
95% CI of ratio	0.5531 to 1.696	0.5896 to 1.808			95% CI of ratio	0.4977 to 1.520	0.6580 to 2.009		95% CI of ratio	0.5933 to 1.822	0.5490 to 1.685
Hazard Ratio (logrank)	A/B	B/A			Hazard Ratio (logrank)	A/C	C/A		Hazard Ratio (logrank)	C/D	D/C
Ratio (and its reciprocal)	0.9788	1.022			Ratio (and its reciprocal)	0.9112	1.097		Ratio (and its reciprocal)	1.026	0.9747
95% CI of ratio	0.6186 to 1.549	0.6458 to 1.617			95% CI of ratio	0.5776 to 1.437	0.6958 to 1.731		95% CI of ratio	0.6504 to 1.618	0.6179 to 1.537

## Sheet: FIGS7B
					Relative florenscence of mCherry (%)
	DMSO						Indole
	EV			daf-16 RNAi			EV			daf-16 RNAi
Day 1	100	100	100	72.0706	83.0827	135.171	96.0333	100.327	102.733	90.9677	79.9586	97.3284
Day 4	303.717	257.974	287.869	276.278	262.985	292.972	226.865	296.333	254.809	298.852	255.997	239.361
Day 7	502.539	410.173	507.669	492.459	279.076	583.851	431.935	451.29	407.799	382.882	489.733	585.103
Day1							Day 4
Column B	EV + Indole		Column B	daf-16 RNAi + Indole			Column D	EV + Indole		Column D	daf-16 RNAi + Indole
vs.	vs.		vs.	vs.			vs.	vs.		vs.	vs.
Column A	EV + DMSO		Column A	daf-16 RNAi + DMSO			Column C	EV + DMSO		Column C	daf-16 RNAi + DMSO
Unpaired t test			Unpaired t test				Unpaired t test			Unpaired t test
P value	0.88		P value	0.73			P value	0.38		P value	0.56
P value summary	ns		P value summary	ns			P value summary	ns		P value summary	ns
Significantly different (P < 0.05)?	No		Significantly different (P < 0.05)?	No			Significantly different (P < 0.05)?	No		Significantly different (P < 0.05)?	No
One- or two-tailed P value?	Two-tailed		One- or two-tailed P value?	Two-tailed			One- or two-tailed P value?	Two-tailed		One- or two-tailed P value?	Two-tailed
t, df	t=0.1542, df=4		t, df	t=0.3658, df=4			t, df	t=0.9843, df=4		t, df	t=0.6424, df=4
How big is the difference?			How big is the difference?				How big is the difference?			How big is the difference?
Mean of column A	100		Mean of column A	96.77			Mean of column C	283.2		Mean of column C	277.4
Mean of column B	99.7		Mean of column B	89.42			Mean of column D	259.3		Mean of column D	264.7
Difference between means (B - A) ± SEM	-0.3022 ± 1.960		Difference between means (B - A) ± SEM	-7.356 ± 20.11			Difference between means (D - C) ± SEM	-23.85 ± 24.23		Difference between means (D - C) ± SEM	-12.68 ± 19.73
95% confidence interval	-5.743 to 5.138		95% confidence interval	-63.19 to 48.48			95% confidence interval	-91.13 to 43.42		95% confidence interval	-67.46 to 42.10
R squared (eta squared)	0.005911		R squared (eta squared)	0.03237			R squared (eta squared)	0.195		R squared (eta squared)	0.09353
F test to compare variances			F test to compare variances				F test to compare variances			F test to compare variances
F, DFn, Dfd	Infinity, 2, 2		F, DFn, Dfd	14.71, 2, 2			F, DFn, Dfd	2.265, 2, 2		F, DFn, Dfd	4.173, 2, 2
P value	<0.001		P value	0.13			P value	0.61		P value	0.39
P value summary	***		P value summary	ns			P value summary	ns		P value summary	ns
Significantly different (P < 0.05)?	Yes		Significantly different (P < 0.05)?	No			Significantly different (P < 0.05)?	No		Significantly different (P < 0.05)?	No
Data analyzed			Data analyzed				Data analyzed			Data analyzed
Sample size, column A	3		Sample size, column A	3			Sample size, column E	3		Sample size, column C	3
Sample size, column B	3		Sample size, column B	3			Sample size, column F	3		Sample size, column D	3
Day 7
Column F	EV + Indole		Column F	daf-16 RNAi + Indole
vs.	vs.		vs.	vs.
Column E	EV + DMSO		Column E	daf-16 RNAi + DMSO
Unpaired t test			Unpaired t test
P value	0.27		P value	0.77
P value summary	ns		P value summary	ns
Significantly different (P < 0.05)?	No		Significantly different (P < 0.05)?	No
One- or two-tailed P value?	Two-tailed		One- or two-tailed P value?	Two-tailed
t, df	t=1.265, df=4		t, df	t=0.3172, df=4
How big is the difference?			How big is the difference?
Mean of column E	473.5		Mean of column E	451.8
Mean of column F	430.3		Mean of column F	485.9
Difference between means (F - E) ± SEM	-43.12 ± 34.08		Difference between means (F - E) ± SEM	34.11 ± 107.5
95% confidence interval	-137.8 to 51.52		95% confidence interval	-264.5 to 332.7
R squared (eta squared)	0.2858		R squared (eta squared)	0.02453
F test to compare variances			F test to compare variances
F, DFn, Dfd	6.341, 2, 2		F, DFn, Dfd	2.390, 2, 2
P value	0.27		P value	0.59
P value summary	ns		P value summary	ns
Significantly different (P < 0.05)?	No		Significantly different (P < 0.05)?	No
Data analyzed			Data analyzed
Sample size, column E	3		Sample size, column E	3
Sample size, column F	3		Sample size, column F	3
