# Supplementary material for: Indole produced during dysbiosis mediates host–microorganism chemical communication
Source: eLife. 2023 Nov 21;12:e85362. doi: 10.7554/eLife.85362 (PMC10691800; doi:10.7554/eLife.85362)
Supplement: Figure 4—figure supplement 3—source data 1. [file elife-85362-fig4-figsupp3-data1.xlsx]

## Sheet: FIGS8B
				% SKN-1 distribution
	Strongly nuclear			Weakly nuclear			Cytoplasmic
DMSO	0	0	0	0	0	0	100	100	100
Indole	0	0	0	3.6	5.4	0	96.4	94.6	100
NaN3	30	38.1	33.3	26	23.8	20.8	44	38.1	45.9
DMSO vs Indole						DMSO vs NaN3
P value and statistical significance						P value and statistical significance
Test	Chi-square					Test	Chi-square
Chi-square, df	3.046, 1					Chi-square, df	81.69, 2
z	1.745					P value	<0.001
P value	0.081					P value summary	***
P value summary	ns					One- or two-sided	NA
One- or two-sided	Two-sided					Statistically significant (P < 0.05)?	Yes
Statistically significant (P < 0.05)?	No
						Data analyzed
Data analyzed	Weakly nuclear	Cytoplasmic	Total			Number of rows	2
DMSO	0	100	100			Number of columns	3
Indole	3	97	100
Total	3	197	200
Percentage of row total	Weakly nuclear	Cytoplasmic
DMSO	0.00%	100.00%
Indole	3.00%	97.00%
Percentage of column total	Weakly nuclear	Cytoplasmic
DMSO	0.00%	50.76%
Indole	100.00%	49.24%
Percentage of grand total	Weakly nuclear	Cytoplasmic
DMSO	0.00%	50.00%
Indole	1.50%	48.50%

## Sheet: FIGS8C
				% DAF-16 distribution
	Strongly nuclear			Weakly nuclear			Cytoplasmic
DMSO	0	0	0	0	5.8	0	100	94.2	100
Indole	0	6	0	45.2	36	39.6	54.8	58	60.4
Podacarpic acid	0	0	0	7.8	0	6.3	92.2	100	93.7
DMSO vs Indole					DMSO vs Podacarpic acid
P value and statistical significance					P value and statistical significance
Test	Chi-square				Test	Chi-square
Chi-square, df	46.64, 2				Chi-square, df	2.909, 1
P value	<0.001				z	1.705
P value summary	***				P value	0.0881
One- or two-sided	NA				P value summary	ns
Statistically significant (P < 0.05)?	Yes				One- or two-sided	Two-sided
					Statistically significant (P < 0.05)?	No
Data analyzed
Number of rows	2				Data analyzed	Weakly nuclear	Cytoplasmic	Total
Number of columns	3				DMSO	2	98	100
					Podacarpic acid	7	93	100
					Total	9	191	200
					Percentage of row total	Weakly nuclear	Cytoplasmic
					DMSO	2.00%	98.00%
					Podacarpic acid	7.00%	93.00%
					Percentage of column total	Weakly nuclear	Cytoplasmic
					DMSO	22.22%	51.31%
					Podacarpic acid	77.78%	48.69%
					Percentage of grand total	Weakly nuclear	Cytoplasmic
					DMSO	1.00%	49.00%
					Podacarpic acid	3.50%	46.50%
