# Supplementary material for: Indole produced during dysbiosis mediates host–microorganism chemical communication
Source: eLife. 2023 Nov 21;12:e85362. doi: 10.7554/eLife.85362 (PMC10691800; doi:10.7554/eLife.85362)
Supplement: Figure 4—source data 1. [file elife-85362-fig4-data1.xlsx]

## Sheet: FIG4A
					% DAF-16 distribution
		Strongly nuclear			Weakly nuclear			Cytoplasmic
Day 1	EV	0	0	0	6	5	4	94	95	96
	trpa-1 RNAi	0	0	0	10	6	7	90	94	93
Day 4	EV	0	0	3.5	36	35	40	64	65	56.5
	trpa-1 RNAi	0	0	0	13	5	15	87	95	85
Day 7	EV	4.7	10	0	32.7	35	47	52.6	55	53
	trpa-1 RNAi	0	0	0	25	18	7	75	82	93
Day 4							Day 7
P value and statistical significance							P value and statistical significance
Test	Chi-square						Test	Chi-square
Chi-square, df	19.91, 2						Chi-square, df	19.12, 2
P value	<0.001						P value	<0.001
P value summary	***						P value summary	***
One- or two-sided	NA						One- or two-sided	NA
Statistically significant (P < 0.05)?	Yes						Statistically significant (P < 0.05)?	Yes
Data analyzed							Data analyzed
Number of rows	2						Number of rows	2
Number of columns	3						Number of columns	3

## Sheet: FIG4B
					% DAF-16 distribution
		Strongly nuclear			Weakly nuclear			Cytoplasmic
24 h EV DMSO	0	0	0	12	5	10	88	95	90
24 h EV Indole	0	10.4	0	58	35	37	42	54.6	63
24 h trpa-1 RNAi DMSO	0	0	0	8	12	6	92	88	94
24 h trpa-1 RNAi Indole	0	0	0	10	15	7	90	85	93
24 h EV DMSO vs 24 h EV Indole							24 h EV Indole vs 24 h trpa-1 RNAi Indole
P value and statistical significance							P value and statistical significance
Test	Chi-square						Test	Chi-square
Chi-square, df	36.26, 2						Chi-square, df	32.09, 2
P value	<0.001						P value	<0.001
P value summary	***						P value summary	***
One- or two-sided	NA						One- or two-sided	NA
Statistically significant (P < 0.05)?	Yes						Statistically significant (P < 0.05)?	Yes
Data analyzed							Data analyzed
Number of rows	2						Number of rows	2
Number of columns	3						Number of columns	3

## Sheet: FIG4C
		WT
Days	Percent survival
	EV DMSO	EV Indole	trpa-1 RNAi DMSO	trpa-1RNAi Indole
0	100	100	100	100
5	98.0392	98.1481	97.9167	98
7	96.0784	96.2963	91.6667	94
9	92.1569	94.4444	83.3333	86
11	86.2745	92.5926	77.0833	80
13	78.4314	88.8889	68.75	70
15	70.5882	83.3333	56.25	60
17	62.7451	72.2222	43.75	50
19	50.9804	64.8148	31.25	40
21	35.2941	51.8519	18.75	24
23	25.4902	38.8889	8.33333	10
25	13.7255	27.7778	0	0
27	5.88235	18.5185
29	0	11.1111
31		3.7037
33		0
EV				DMSO
DMSO vs Indole				EV vs trpa-1 RNAi
Comparison of Survival Curves				Comparison of Survival Curves
Log-rank (Mantel-Cox) test				Log-rank (Mantel-Cox) test
Chi square	5.973			Chi square	7.719
df	1			df	1
P value	0.0145			P value	0.0055
P value summary	*			P value summary	**
Are the survival curves sig different?	Yes			Are the survival curves sig different?	Yes
Median survival				Median survival
EV DMSO	21			EV DMSO	21
EV Indole	23			trpa-1 RNAi DMSO	17
Ratio (and its reciprocal)	0.913	1.095		Ratio (and its reciprocal)	1.235	0.8095
95% CI of ratio	0.6227 to 1.339	0.7470 to 1.606		95% CI of ratio	0.8329 to 1.832	0.5458 to 1.201
Hazard Ratio (Mantel-Haenszel)	A/B	B/A		Hazard Ratio (Mantel-Haenszel)	A/C	C/A
Ratio (and its reciprocal)	1.758	0.5688		Ratio (and its reciprocal)	0.5102	1.96
95% CI of ratio	1.118 to 2.764	0.3618 to 0.8943		95% CI of ratio	0.3174 to 0.8202	1.219 to 3.150
Hazard Ratio (logrank)	A/B	B/A		Hazard Ratio (logrank)	A/C	C/A
Ratio (and its reciprocal)	1.509	0.6626		Ratio (and its reciprocal)	0.6213	1.61
95% CI of ratio	1.019 to 2.236	0.4472 to 0.9816		95% CI of ratio	0.4130 to 0.9345	1.070 to 2.421
trpa-1 RNAi				Indole
DMSO vs Indole				EV vs trpa-1 RNAi
Comparison of Survival Curves				Comparison of Survival Curves
Log-rank (Mantel-Cox) test				Log-rank (Mantel-Cox) test
Chi square	0.4502			Chi square	17.99
df	1			df	1
P value	0.5023			P value	<0.001
P value summary	ns			P value summary	***
Are the survival curves sig different?	No			Are the survival curves sig different?	Yes
Median survival				Median survival
trpa-1 RNAi DMSO	17			EV Indole	23
trpa-1RNAi Indole	18			trpa-1RNAi Indole	18
Ratio (and its reciprocal)	0.9444	1.059		Ratio (and its reciprocal)	1.278	0.7826
95% CI of ratio	0.6356 to 1.403	0.7126 to 1.573		95% CI of ratio	0.8697 to 1.877	0.5327 to 1.150
Hazard Ratio (Mantel-Haenszel)	C/D	D/C		Hazard Ratio (Mantel-Haenszel)	B/D	D/B
Ratio (and its reciprocal)	1.176	0.8502		Ratio (and its reciprocal)	0.3519	2.842
95% CI of ratio	0.7322 to 1.889	0.5293 to 1.366		95% CI of ratio	0.2172 to 0.5702	1.754 to 4.605
Hazard Ratio (logrank)	C/D	D/C		Hazard Ratio (logrank)	B/D	D/B
Ratio (and its reciprocal)	1.12	0.8927		Ratio (and its reciprocal)	0.497	2.012
95% CI of ratio	0.7531 to 1.666	0.6001 to 1.328		95% CI of ratio	0.3286 to 0.7517	1.330 to 3.043

## Sheet: FIG4D
	Day 4
CFU per worm (log10)
EV		trpa-1 RNAi
DMSO	Indole	DMSO	Indole
2.52	1.22	2.47	2.52
2.27	1.47	3.36	3.3
2.52	2.1	3	2.5
2.13	1.01	3.32	2.45
2.35	0.87	2.99	2.66
EV			trpa-1 RNAi
Column B	Indole		Column D	Indole
vs.	vs.		vs.	vs.
Column A	DMSO		Column C	DMSO
Unpaired t test			Unpaired t test
P value	0.0021		P value	0.1655
P value summary	**		P value summary	ns
Significantly different (P < 0.05)?	Yes		Significantly different (P < 0.05)?	No
One- or two-tailed P value?	Two-tailed		One- or two-tailed P value?	Two-tailed
t, df	t=4.467, df=8		t, df	t=1.526, df=8
How big is the difference?			How big is the difference?
Mean of column A	2.358		Mean of column C	3.028
Mean of column B	1.334		Mean of column D	2.686
Difference between means (B - A) ± SEM	-1.024 ± 0.2292		Difference between means (D - C) ± SEM	-0.3420 ± 0.2241
95% confidence interval	-1.553 to -0.4954		95% confidence interval	-0.8588 to 0.1748
R squared (eta squared)	0.7139		R squared (eta squared)	0.2254
F test to compare variances			F test to compare variances
F, DFn, Dfd	8.359, 4, 4		F, DFn, Dfd	1.027, 4, 4
P value	0.0636		P value	0.9798
P value summary	ns		P value summary	ns
Significantly different (P < 0.05)?	No		Significantly different (P < 0.05)?	No
Data analyzed			Data analyzed
Sample size, column A	5		Sample size, column C	5
Sample size, column B	5		Sample size, column D	5

## Sheet: FIG4E
	Day 7
CFU per worm (log10)
EV		trpa-1 RNAi
DMSO	Indole	DMSO	Indole
3	1.75	3.56	4
2.82	1.67	4.23	3.72
2.81	2.32	3.43	3.3
2.84	1.32	3.79	3.25
2.89	1.55	4.1	4.01
EV			trpa-1 RNAi
Column B	Indole		Column D	Indole
vs.	vs.		vs.	vs.
Column A	DMSO		Column C	DMSO
Unpaired t test			Unpaired t test
P value	0.001		P value	0.4804
P value summary	***		P value summary	ns
Significantly different (P < 0.05)?	Yes		Significantly different (P < 0.05)?	No
One- or two-tailed P value?	Two-tailed		One- or two-tailed P value?	Two-tailed
t, df	t=6.773, df=8		t, df	t=0.7400, df=8
How big is the difference?			How big is the difference?
Mean of column A	2.872		Mean of column C	3.822
Mean of column B	1.722		Mean of column D	3.656
Difference between means (B - A) ± SEM	-1.150 ± 0.1698		Difference between means (D - C) ± SEM	-0.1660 ± 0.2243
95% confidence interval	-1.542 to -0.7585		95% confidence interval	-0.6833 to 0.3513
R squared (eta squared)	0.8515		R squared (eta squared)	0.06407
F test to compare variances			F test to compare variances
F, DFn, Dfd	22.75, 4, 4		F, DFn, Dfd	1.155, 4, 4
P value	0.0103		P value	0.8925
P value summary	*		P value summary	ns
Significantly different (P < 0.05)?	Yes		Significantly different (P < 0.05)?	No
Data analyzed			Data analyzed
Sample size, column A	5		Sample size, column C	5
Sample size, column B	5		Sample size, column D	5
Data analyzed
Sample size, column A	5
Sample size, column B	5
