# Supplementary material for: Indole produced during dysbiosis mediates host–microorganism chemical communication
Source: eLife. 2023 Nov 21;12:e85362. doi: 10.7554/eLife.85362 (PMC10691800; doi:10.7554/eLife.85362)
Supplement: Figure 5—source data 1. [file elife-85362-fig5-data1.xlsx]

## Sheet: FIG5A
		TU3401
Days	Percent survival
	EV DMSO	EV Indole	trpa-1 RNAi DMSO	trpa-1RNAi Indole
0	100	100	100	100
7	94	98.0769	93.0233	91.4894
9	88	94.2308	81.3953	82.9787
11	84	92.3077	72.093	72.3404
13	80	86.5385	62.7907	65.9574
15	74	82.6923	51.1628	59.5745
17	58	75	39.5349	40.4255
19	46	65.3846	27.907	27.6596
21	34	53.8462	13.9535	17.0213
23	22	38.4615	0	0
25	10	28.8462
27	4	17.3077
29	0	11.5385
31		7.69231
33		0
EV				DMSO
DMSO vs Indole				EV vs trpa-1 RNAi
Comparison of Survival Curves				Comparison of Survival Curves
Log-rank (Mantel-Cox) test				Log-rank (Mantel-Cox) test
Chi square	8.194			Chi square	9.476
df	1			df	1
P value	0.0042			P value	0.0021
P value summary	**			P value summary	**
Are the survival curves sig different?	Yes			Are the survival curves sig different?	Yes
Median survival				Median survival
EV DMSO	19			EV DMSO	19
EV Indole	23			trpa-1 RNAi DMSO	17
Ratio (and its reciprocal)	0.8261	1.211		Ratio (and its reciprocal)	1.118	0.8947
95% CI of ratio	0.5603 to 1.218	0.8211 to 1.785		95% CI of ratio	0.7435 to 1.680	0.5952 to 1.345
Hazard Ratio (Mantel-Haenszel)	A/B	B/A		Hazard Ratio (Mantel-Haenszel)	A/C	C/A
Ratio (and its reciprocal)	1.968	0.5081		Ratio (and its reciprocal)	0.4528	2.208
95% CI of ratio	1.238 to 3.129	0.3196 to 0.8078		95% CI of ratio	0.2734 to 0.7499	1.334 to 3.657
Hazard Ratio (logrank)	A/B	B/A		Hazard Ratio (logrank)	A/C	C/A
Ratio (and its reciprocal)	1.626	0.6149		Ratio (and its reciprocal)	0.5825	1.717
95% CI of ratio	1.088 to 2.430	0.4115 to 0.9188		95% CI of ratio	0.3786 to 0.8964	1.116 to 2.642
trpa-1 RNAi				Indole
DMSO vs Indole				EV vs trpa-1 RNAi
Comparison of Survival Curves				Comparison of Survival Curves
Log-rank (Mantel-Cox) test				Log-rank (Mantel-Cox) test
Chi square	0.1235			Chi square	26.08
df	1			df	1
P value	0.7253			P value	<0.001
P value summary	ns			P value summary	***
Are the survival curves sig different?	No			Are the survival curves sig different?	Yes
Median survival				Median survival
trpa-1 RNAi DMSO	17			EV Indole	23
trpa-1RNAi Indole	17			trpa-1RNAi Indole	17
Ratio (and its reciprocal)	1	1		Ratio (and its reciprocal)	1.353	0.7391
95% CI of ratio	0.6613 to 1.512	0.6613 to 1.512		95% CI of ratio	0.9119 to 2.007	0.4982 to 1.097
Hazard Ratio (Mantel-Haenszel)	C/D	D/C		Hazard Ratio (Mantel-Haenszel)	B/D	D/B
Ratio (and its reciprocal)	1.095	0.9135		Ratio (and its reciprocal)	0.2602	3.844
95% CI of ratio	0.6608 to 1.814	0.5514 to 1.513		95% CI of ratio	0.1552 to 0.4362	2.293 to 6.445
Hazard Ratio (logrank)	C/D	D/C		Hazard Ratio (logrank)	B/D	D/B
Ratio (and its reciprocal)	1.063	0.941		Ratio (and its reciprocal)	0.4284	2.334
95% CI of ratio	0.7022 to 1.608	0.6217 to 1.424		95% CI of ratio	0.2761 to 0.6646	1.505 to 3.621

## Sheet: FIG5B
		MGH170
Days	Percent survival
	EV DMSO	EV Indole	trpa-1 RNAi DMSO	trpa-1RNAi Indole
0	100	100	100	100
7	93.75	98.0769	88	98.0392
9	89.5833	96.1538	80	94.1176
11	85.4167	94.2308	68	90.1961
13	79.1667	88.4615	62	86.2745
15	72.9167	80.7692	56	82.3529
17	60.4167	73.0769	46	76.4706
19	50	65.3846	34	68.6275
21	37.5	57.6923	20	60.7843
23	27.0833	48.0769	8	45.098
25	16.6667	36.5385	0	35.2941
27	8.33333	26.9231		19.6078
29	0	13.4615		13.7255
31		7.69231		7.84314
33		0		0
EV				DMSO
DMSO vs Indole				EV vs trpa-1 RNAi
Comparison of Survival Curves				Comparison of Survival Curves
Log-rank (Mantel-Cox) test				Log-rank (Mantel-Cox) test
Chi square	8.533			Chi square	8.376
df	1			df	1
P value	0.0035			P value	0.0038
P value summary	**			P value summary	**
Are the survival curves sig different?	Yes			Are the survival curves sig different?	Yes
Median survival				Median survival
EV DMSO	20			EV DMSO	20
EV Indole	23			trpa-1 RNAi DMSO	17
Ratio (and its reciprocal)	0.8696	1.15		Ratio (and its reciprocal)	1.176	0.85
95% CI of ratio	0.5874 to 1.287	0.7768 to 1.702		95% CI of ratio	0.7917 to 1.748	0.5720 to 1.263
Hazard Ratio (Mantel-Haenszel)	A/B	B/A		Hazard Ratio (Mantel-Haenszel)	A/C	C/A
Ratio (and its reciprocal)	2.014	0.4964		Ratio (and its reciprocal)	0.497	2.012
95% CI of ratio	1.259 to 3.223	0.3103 to 0.7942		95% CI of ratio	0.3095 to 0.7980	1.253 to 3.231
Hazard Ratio (logrank)	A/B	B/A		Hazard Ratio (logrank)	A/C	C/A
Ratio (and its reciprocal)	1.654	0.6045		Ratio (and its reciprocal)	0.6085	1.643
95% CI of ratio	1.099 to 2.490	0.4017 to 0.9098		95% CI of ratio	0.4053 to 0.9136	1.095 to 2.467
trpa-1 RNAi				Indole
DMSO vs Indole				EV vs trpa-1 RNAi
Comparison of Survival Curves				Comparison of Survival Curves
Log-rank (Mantel-Cox) test				Log-rank (Mantel-Cox) test
Chi square	27.71			Chi square	0.02728
df	1			df	1
P value	<0.001			P value	0.8688
P value summary	***			P value summary	ns
Are the survival curves sig different?	Yes			Are the survival curves sig different?	No
Median survival				Median survival
trpa-1 RNAi DMSO	17			EV Indole	23
trpa-1RNAi Indole	23			trpa-1RNAi Indole	23
Ratio (and its reciprocal)	0.7391	1.353		Ratio (and its reciprocal)	1	1
95% CI of ratio	0.5004 to 1.092	0.9160 to 1.998		95% CI of ratio	0.6796 to 1.471	0.6796 to 1.471
Hazard Ratio (Mantel-Haenszel)	C/D	D/C		Hazard Ratio (Mantel-Haenszel)	B/D	D/B
Ratio (and its reciprocal)	3.828	0.2612		Ratio (and its reciprocal)	0.9629	1.038
95% CI of ratio	2.322 to 6.310	0.1585 to 0.4306		95% CI of ratio	0.6152 to 1.507	0.6634 to 1.625
Hazard Ratio (logrank)	C/D	D/C		Hazard Ratio (logrank)	B/D	D/B
Ratio (and its reciprocal)	2.393	0.4179		Ratio (and its reciprocal)	0.9723	1.028
95% CI of ratio	1.557 to 3.676	0.2720 to 0.6422		95% CI of ratio	0.6607 to 1.431	0.6989 to 1.513

## Sheet: FIG5C
	TU3401
	Day 4
CFU per worm (log10)
EV		trpa-1 RNAi
DMSO	Indole	DMSO	Indole
1.56	0.67	3.27	3.28
2.66	0.91	3.56	3.45
2.17	1.52	3.22	3.36
1.67	1.18	3.39	3.22
1.52	1.12	2.84	3.46
EV			trpa-1 RNAi
Column B	Indole		Column D	Indole
vs.	vs.		vs.	vs.
Column A	DMSO		Column C	DMSO
Unpaired t test			Unpaired t test
P value	0.0126		P value	0.4666
P value summary	*		P value summary	ns
Significantly different (P < 0.05)?	Yes		Significantly different (P < 0.05)?	No
One- or two-tailed P value?	Two-tailed		One- or two-tailed P value?	Two-tailed
t, df	t=3.201, df=8		t, df	t=0.7643, df=8
How big is the difference?			How big is the difference?
Mean of column A	1.916		Mean of column C	3.256
Mean of column B	1.08		Mean of column D	3.354
Difference between means (B - A) ± SEM	-0.8360 ± 0.2612		Difference between means (D - C) ± SEM	0.09800 ± 0.1282
95% confidence interval	-1.438 to -0.2337		95% confidence interval	-0.1977 to 0.3937
R squared (eta squared)	0.5615		R squared (eta squared)	0.06805
F test to compare variances			F test to compare variances
F, DFn, Dfd	2.392, 4, 4		F, DFn, Dfd	6.487, 4, 4
P value	0.419		P value	0.0975
P value summary	ns		P value summary	ns
Significantly different (P < 0.05)?	No		Significantly different (P < 0.05)?	No
Data analyzed			Data analyzed
Sample size, column A	5		Sample size, column C	5
Sample size, column B	5		Sample size, column D	5

## Sheet: FIG5D
	TU3401
	Day 7
CFU per worm (log10)
EV		trpa-1 RNAi
DMSO	Indole	DMSO	Indole
2.82	1.56	3.75	3.36
2.66	1	3.56	3.8
2.83	1.09	3.47	3.46
3.04	2.12	3.51	3.2
2.64	2.37	3.68	3.24
EV			trpa-1 RNAi
Column B	Indole		Column D	Indole
vs.	vs.		vs.	vs.
Column A	DMSO		Column C	DMSO
Unpaired t test			Unpaired t test
P value	0.0032		P value	0.1661
P value summary	**		P value summary	ns
Significantly different (P < 0.05)?	Yes		Significantly different (P < 0.05)?	No
One- or two-tailed P value?	Two-tailed		One- or two-tailed P value?	Two-tailed
t, df	t=4.156, df=8		t, df	t=1.524, df=8
How big is the difference?			How big is the difference?
Mean of column A	2.798		Mean of column C	3.594
Mean of column B	1.628		Mean of column D	3.412
Difference between means (B - A) ± SEM	-1.170 ± 0.2815		Difference between means (D - C) ± SEM	-0.1820 ± 0.1195
95% confidence interval	-1.819 to -0.5208		95% confidence interval	-0.4575 to 0.09347
R squared (eta squared)	0.6834		R squared (eta squared)	0.2249
F test to compare variances			F test to compare variances
F, DFn, Dfd	14.23, 4, 4		F, DFn, Dfd	4.159, 4, 4
P value	0.0247		P value	0.1963
P value summary	*		P value summary	ns
Significantly different (P < 0.05)?	Yes		Significantly different (P < 0.05)?	No
Data analyzed			Data analyzed
Sample size, column A	5		Sample size, column C	5
Sample size, column B	5		Sample size, column D	5

## Sheet: FIG5E
	MGH170
	Day 4
CFU per worm (log10)
EV		trpa-1 RNAi
DMSO	Indole	DMSO	Indole
2.46	0.88	3.12	1.62
2.52	1.52	3.21	1.3
1.93	1.12	3.18	1.72
1.71	1.25	3.17	1.02
1.56	1.42	2.82	1.52
EV			trpa-1 RNAi
Column B	Indole		Column D	Indole
vs.	vs.		vs.	vs.
Column A	DMSO		Column C	DMSO
Unpaired t test			Unpaired t test
P value	0.0076		P value	<0.001
P value summary	**		P value summary	***
Significantly different (P < 0.05)?	Yes		Significantly different (P < 0.05)?	Yes
One- or two-tailed P value?	Two-tailed		One- or two-tailed P value?	Two-tailed
t, df	t=3.546, df=8		t, df	t=11.55, df=8
How big is the difference?			How big is the difference?
Mean of column A	2.036		Mean of column C	3.1
Mean of column B	1.238		Mean of column D	1.436
Difference between means (B - A) ± SEM	-0.7980 ± 0.2251		Difference between means (D - C) ± SEM	-1.664 ± 0.1441
95% confidence interval	-1.317 to -0.2790		95% confidence interval	-1.996 to -1.332
R squared (eta squared)	0.6111		R squared (eta squared)	0.9434
F test to compare variances			F test to compare variances
F, DFn, Dfd	2.974, 4, 4		F, DFn, Dfd	3.064, 4, 4
P value	0.3161		P value	0.3037
P value summary	ns		P value summary	ns
Significantly different (P < 0.05)?	No		Significantly different (P < 0.05)?	No
Data analyzed			Data analyzed
Sample size, column A	5		Sample size, column C	5
Sample size, column B	5		Sample size, column D	5

## Sheet: FIG5F
	MGH170
	Day 7
CFU per worm (log10)
EV		trpa-1 RNAi
DMSO	Indole	DMSO	Indole
2.52	1.56	3.52	2.27
2.79	1.36	3.36	2.01
2.6	2.21	3.53	2.53
2.74	1.38	3.72	1.58
2.72	2.34	3.88	1.25
EV			trpa-1 RNAi
Column B	Indole		Column D	Indole
vs.	vs.		vs.	vs.
Column A	DMSO		Column C	DMSO
Unpaired t test			Unpaired t test
P value	0.003		P value	0.0001
P value summary	**		P value summary	***
Significantly different (P < 0.05)?	Yes		Significantly different (P < 0.05)?	Yes
One- or two-tailed P value?	Two-tailed		One- or two-tailed P value?	Two-tailed
t, df	t=4.188, df=8		t, df	t=6.754, df=8
How big is the difference?			How big is the difference?
Mean of column A	2.674		Mean of column C	3.602
Mean of column B	1.77		Mean of column D	1.928
Difference between means (B - A) ± SEM	-0.9040 ± 0.2159		Difference between means (D - C) ± SEM	-1.674 ± 0.2478
95% confidence interval	-1.402 to -0.4062		95% confidence interval	-2.246 to -1.102
R squared (eta squared)	0.6867		R squared (eta squared)	0.8508
F test to compare variances			F test to compare variances
F, DFn, Dfd	17.97, 4, 4		F, DFn, Dfd	6.599, 4, 4
P value	0.0161		P value	0.0948
P value summary	*		P value summary	ns
Significantly different (P < 0.05)?	Yes		Significantly different (P < 0.05)?	No
Data analyzed			Data analyzed
Sample size, column A	5		Sample size, column C	5
Sample size, column B	5		Sample size, column D	5
