# Supplementary material for: Indole produced during dysbiosis mediates host–microorganism chemical communication
Source: eLife. 2023 Nov 21;12:e85362. doi: 10.7554/eLife.85362 (PMC10691800; doi:10.7554/eLife.85362)
Supplement: Figure 6—figure supplement 1—source data 1. [file elife-85362-fig6-figsupp1-data1.xlsx]

## Sheet: FIGS9A
Days	OP50
	Percent survival
	WT EV	lys-7 EV	lys-8 EV	lys-2 RNAi
0	100	100	100	100
5		93.1818	97.7273	93.1818
8	95.2381	86.3636	95.4545	84.0909
11	85.7143	70.4545	84.0909	77.2727
14	71.4286	50	68.1818	59.0909
17	57.1429	31.8182	52.2727	40.9091
20	28.5714	18.1818	25	18.1818
23	11.9048	4.54545	9.09091	4.54545
26	4.7619	0	2.27273	0
29	0		0
EV				EV				WT
WT vs lys-7				WT vs lys-8				EV vs lys-2 RNAi
Comparison of Survival Curves				Comparison of Survival Curves				Comparison of Survival Curves
Log-rank (Mantel-Cox) test				Log-rank (Mantel-Cox) test				Log-rank (Mantel-Cox) test
Chi square	5.348			Chi square	0.3527			Chi square	3.44
df	1			df	1			df	1
P value	0.0207			P value	0.5526			P value	0.0636
P value summary	*			P value summary	ns			P value summary	ns
Are the survival curves sig different?	Yes			Are the survival curves sig different?	No			Are the survival curves sig different?	No
Median survival				Median survival				Median survival
WT EV	20			WT EV	20			WT EV	20
lys-7 EV	15.5			lys-8 EV	20			lys-2 RNAi	17
Ratio (and its reciprocal)	1.29	0.775		Ratio (and its reciprocal)	1	1		Ratio (and its reciprocal)	1.176	0.85
95% CI of ratio	0.8454 to 1.969	0.5078 to 1.183		95% CI of ratio	0.6552 to 1.526	0.6552 to 1.526		95% CI of ratio	0.7708 to 1.796	0.5569 to 1.297
Hazard Ratio (Mantel-Haenszel)	A/B	B/A		Hazard Ratio (Mantel-Haenszel)	A/C	C/A		Hazard Ratio (Mantel-Haenszel)	A/D	D/A
Ratio (and its reciprocal)	0.5335	1.874		Ratio (and its reciprocal)	0.8497	1.177		Ratio (and its reciprocal)	0.6021	1.661
95% CI of ratio	0.3133 to 0.9087	1.101 to 3.192		95% CI of ratio	0.4963 to 1.455	0.6875 to 2.015		95% CI of ratio	0.3522 to 1.029	0.9716 to 2.839
Hazard Ratio (logrank)	A/B	B/A		Hazard Ratio (logrank)	A/C	C/A		Hazard Ratio (logrank)	A/D	D/A
Ratio (and its reciprocal)	0.6706	1.491		Ratio (and its reciprocal)	0.9042	1.106		Ratio (and its reciprocal)	0.7283	1.373
95% CI of ratio	0.4365 to 1.030	0.9707 to 2.291		95% CI of ratio	0.5924 to 1.380	0.7246 to 1.688		95% CI of ratio	0.4754 to 1.116	0.8962 to 2.103

## Sheet: FIGS9B
Days	HK OP50
	Percent survival
	WT EV	lys-7 EV	lys-8 EV	lys-2 RNAi
0	100	100	100	100
8	96.0784	96.0784	98	94.2308
11	88.2353	88.2353	88	88.4615
14	76.4706	70.5882	74	69.2308
17	64.7059	54.902	60	53.8462
20	43.1373	43.1373	38	30.7692
23	29.4118	31.3725	24	19.2308
26	23.5294	25.4902	18	15.3846
29	17.6471	17.6471	12	9.61538
32	11.7647	11.7647	4	5.76923
35	5.88235	5.88235	0	0
38	0	0
EV				EV				WT
WT vs lys-7				WT vs lys-8				EV vs lys-2 RNAi
Comparison of Survival Curves				Comparison of Survival Curves				Comparison of Survival Curves
Log-rank (Mantel-Cox) test				Log-rank (Mantel-Cox) test				Log-rank (Mantel-Cox) test
Chi square	0.02921			Chi square	1.395			Chi square	2.659
df	1			df	1			df	1
P value	0.8643			P value	0.2376			P value	0.103
P value summary	ns			P value summary	ns			P value summary	ns
Are the survival curves sig different?	No			Are the survival curves sig different?	No			Are the survival curves sig different?	No
Median survival				Median survival				Median survival
WT EV	20			WT EV	20			WT EV	20
lys-7 EV	20			lys-8 EV	20			lys-2 RNAi	20
Ratio (and its reciprocal)	1	1		Ratio (and its reciprocal)	1	1		Ratio (and its reciprocal)	1	1
95% CI of ratio	0.6783 to 1.474	0.6783 to 1.474		95% CI of ratio	0.6770 to 1.477	0.6770 to 1.477		95% CI of ratio	0.6796 to 1.471	0.6796 to 1.471
Hazard Ratio (Mantel-Haenszel)	A/B	B/A		Hazard Ratio (Mantel-Haenszel)	A/C	C/A		Hazard Ratio (Mantel-Haenszel)	A/D	D/A
Ratio (and its reciprocal)	0.9613	1.04		Ratio (and its reciprocal)	0.7569	1.321		Ratio (and its reciprocal)	0.6821	1.466
95% CI of ratio	0.6113 to 1.512	0.6615 to 1.636		95% CI of ratio	0.4767 to 1.202	0.8321 to 2.098		95% CI of ratio	0.4307 to 1.080	0.9257 to 2.322
Hazard Ratio (logrank)	A/B	B/A		Hazard Ratio (logrank)	A/C	C/A		Hazard Ratio (logrank)	A/D	D/A
Ratio (and its reciprocal)	0.9714	1.029		Ratio (and its reciprocal)	0.8194	1.22		Ratio (and its reciprocal)	0.7624	1.312
95% CI of ratio	0.6589 to 1.432	0.6983 to 1.518		95% CI of ratio	0.5535 to 1.213	0.8243 to 1.807		95% CI of ratio	0.5166 to 1.125	0.8887 to 1.936

## Sheet: FIGS9C
Days	OP50 lys-7; lys-8
	Percent survival
	EV	lys-2 RNAi
0	100	100
5	93.0233	95.5556
8	81.3953	84.4444
11	60.4651	66.6667
14	32.5581	42.2222
17	13.9535	24.4444
20	0	4.44444
23		0
Comparison of Survival Curves
Log-rank (Mantel-Cox) test
Chi square	1.841
df	1
P value	0.1748
P value summary	ns
Are the survival curves sig different?	No
Median survival
EV	14
lys-2 RNAi	14
Ratio (and its reciprocal)	1	1
95% CI of ratio	0.6584 to 1.519	0.6584 to 1.519
Hazard Ratio (Mantel-Haenszel)	A/B	B/A
Ratio (and its reciprocal)	1.464	0.6828
95% CI of ratio	0.8440 to 2.541	0.3936 to 1.185
Hazard Ratio (logrank)	A/B	B/A
Ratio (and its reciprocal)	1.247	0.8018
95% CI of ratio	0.8182 to 1.901	0.5260 to 1.222

## Sheet: FIGS9D
Days	HKOP50 lys-7; lys-8
	Percent survival
	EV	lys-2 RNAi
0	100	100
8	97.1429	96.7742
11	91.4286	93.5484
14	82.8571	87.0968
17	80	80.6452
20	65.7143	67.7419
23	54.2857	58.0645
26	45.7143	45.1613
29	28.5714	29.0323
32	14.2857	12.9032
35	5.71429	6.45161
38	0	0
Comparison of Survival Curves
Log-rank (Mantel-Cox) test
Chi square	0.005516
df	1
P value	0.9408
P value summary	ns
Are the survival curves sig different?	No
Median survival
EV	26
lys-2 RNAi	26
Ratio (and its reciprocal)	1	1
95% CI of ratio	0.6167 to 1.622	0.6167 to 1.622
Hazard Ratio (Mantel-Haenszel)	A/B	B/A
Ratio (and its reciprocal)	1.022	0.9784
95% CI of ratio	0.5750 to 1.816	0.5505 to 1.739
Hazard Ratio (logrank)	A/B	B/A
Ratio (and its reciprocal)	1.016	0.9847
95% CI of ratio	0.6264 to 1.646	0.6074 to 1.596
