# Supplementary material for: Indole produced during dysbiosis mediates host–microorganism chemical communication
Source: eLife. 2023 Nov 21;12:e85362. doi: 10.7554/eLife.85362 (PMC10691800; doi:10.7554/eLife.85362)
Supplement: Figure 6—figure supplement 2—source data 1. [file elife-85362-fig6-figsupp2-data1.xlsx]

## Sheet: FIGS10A
Days	lys-7; lys-8
	Percent survival
	DMSO	Indole
0	100	100
5	91.8919	94.4444
8	86.4865	88.8889
11	75.6757	77.7778
14	54.0541	61.1111
17	32.4324	41.6667
20	8.10811	16.6667
23	0	5.55556
26		0
Comparison of Survival Curves
Log-rank (Mantel-Cox) test
Chi square	1.45
df	1
P value	0.2285
P value summary	ns
Are the survival curves sig different?	No
Median survival
DMSO	17
Indole	17
Ratio (and its reciprocal)	1	1
95% CI of ratio	0.6320 to 1.582	0.6320 to 1.582
Hazard Ratio (Mantel-Haenszel)	A/B	B/A
Ratio (and its reciprocal)	1.438	0.6953
95% CI of ratio	0.7960 to 2.599	0.3848 to 1.256
Hazard Ratio (logrank)	A/B	B/A
Ratio (and its reciprocal)	1.245	0.8032
95% CI of ratio	0.7853 to 1.974	0.5066 to 1.273

## Sheet: FIGS10B
		lys-7; lys-8
	CFU per worm (log10)
Day 1		Day 4		Day 7
DMSO	Indole	DMSO	Indole	DMSO	Indole
0.4	0.75	2.52	2.75	3.07	3.52
0.88	0.56	3.03	2.88	3.6	3.56
0.79	0.52	2.9	2.83	3.43	3.45
0.46	0.87	2.46	2.82	3.21	2.92
0.6	0.93	1.67	1.84	2.98	3.33
Day 1			Day 4			Day 7
Column B	Indole		Column D	Indole		Column F	Indole
vs.	vs.		vs.	vs.		vs.	vs.
Column A	DMSO		Column C	DMSO		Column E	DMSO
Unpaired t test			Unpaired t test			Unpaired t test
P value	0.4405		P value	0.7356		P value	0.5637
P value summary	ns		P value summary	ns		P value summary	ns
Significantly different (P < 0.05)?	No		Significantly different (P < 0.05)?	No		Significantly different (P < 0.05)?	No
One- or two-tailed P value?	Two-tailed		One- or two-tailed P value?	Two-tailed		One- or two-tailed P value?	Two-tailed
t, df	t=0.8116, df=8		t, df	t=0.3497, df=8		t, df	t=0.6022, df=8
How big is the difference?			How big is the difference?			How big is the difference?
Mean of column A	0.626		Mean of column C	2.516		Mean of column E	3.258
Mean of column B	0.726		Mean of column D	2.624		Mean of column F	3.356
Difference between means (B - A) ± SEM	0.1000 ± 0.1232		Difference between means (D - C) ± SEM	0.1080 ± 0.3088		Difference between means (F - E) ± SEM	0.09800 ± 0.1627
95% confidence interval	-0.1841 to 0.3841		95% confidence interval	-0.6041 to 0.8201		95% confidence interval	-0.2772 to 0.4732
R squared (eta squared)	0.07607		R squared (eta squared)	0.01506		R squared (eta squared)	0.04337
F test to compare variances			F test to compare variances			F test to compare variances
F, DFn, Dfd	1.284, 4, 4		F, DFn, Dfd	1.455, 4, 4		F, DFn, Dfd	1.025, 4, 4
P value	0.8142		P value	0.7251		P value	0.9812
P value summary	ns		P value summary	ns		P value summary	ns
Significantly different (P < 0.05)?	No		Significantly different (P < 0.05)?	No		Significantly different (P < 0.05)?	No
Data analyzed			Data analyzed			Data analyzed
Sample size, column A	5		Sample size, column C	5		Sample size, column E	5
Sample size, column B	5		Sample size, column D	5		Sample size, column F	5
