# Supplementary material for: Indole produced during dysbiosis mediates host–microorganism chemical communication
Source: eLife. 2023 Nov 21;12:e85362. doi: 10.7554/eLife.85362 (PMC10691800; doi:10.7554/eLife.85362)
Supplement: Figure 6—source data 1. [file elife-85362-fig6-data1.xlsx]

## Sheet: FIG6A
	OP50
Days	Percent survival
	WT	lys-7; lys8
0	100	100
5		93.0233
8	95.2381	81.3953
11	85.7143	60.4651
14	71.4286	32.5581
17	57.1429	13.9535
20	28.5714	0
23	11.9048
26	4.7619
29	0
Comparison of Survival Curves
Log-rank (Mantel-Cox) test
Chi square	23.31
df	1
P value	<0.001
P value summary	***
Are the survival curves sig different?	Yes
Median survival
WT	20
lys-7; lys-8	14
Ratio (and its reciprocal)	1.429	0.7
95% CI of ratio	0.9338 to 2.186	0.4575 to 1.071
Hazard Ratio (Mantel-Haenszel)	A/B	B/A
Ratio (and its reciprocal)	0.2413	4.144
95% CI of ratio	0.1355 to 0.4297	2.327 to 7.380
Hazard Ratio (logrank)	A/B	B/A
Ratio (and its reciprocal)	0.4449	2.248
95% CI of ratio	0.2813 to 0.7037	1.421 to 3.555

## Sheet: FIG6B
	OP50
Days	Percent survival
	WT	lys-7; lys8
0	100	100
8	97.1429	93.9394
11	94.2857	87.8788
14	88.5714	84.8485
17	82.8571	75.7576
20	68.5714	60.6061
23	57.1429	48.4848
26	45.7143	39.3939
29	28.5714	21.2121
32	20	6.06061
35	8.57143	0
38	0
Comparison of Survival Curves
Log-rank (Mantel-Cox) test
Chi square	2.084
df	1
P value	0.1488
P value summary	ns
Are the survival curves sig different?	No
Median survival
WT	26
lys-7; lys-8	23
Ratio (and its reciprocal)	1.13	0.8846
95% CI of ratio	0.7026 to 1.819	0.5498 to 1.423
Hazard Ratio (Mantel-Haenszel)	A/B	B/A
Ratio (and its reciprocal)	0.6566	1.523
95% CI of ratio	0.3708 to 1.162	0.8603 to 2.697
Hazard Ratio (logrank)	A/B	B/A
Ratio (and its reciprocal)	0.7445	1.343
95% CI of ratio	0.4594 to 1.207	0.8288 to 2.177

## Sheet: FIG6C
Pharyngeal pumping / 30s
Day 1				Day 7
OP50		HK OP50		OP50		HK OP50
WT	lys-7; lys8	WT	lys-7; lys8	WT	lys-7; lys8	WT	lys-7; lys8
98	108	88	138	80	44	85	84
120	118	110	108	82	62	72	78
131	121	121	109	52	50	92	80
132	125	128	115	78	52	76	82
118	114	118	124	85	48	83	73
Day 7			Day 7
OP50			HK OP50
Column F	lys-7; lys8		Column H	lys-7; lys8
vs.	vs.		vs.	vs.
Column E	WT		Column G	WT
Unpaired t test			Unpaired t test
P value	0.0067		P value	0.5953
P value summary	**		P value summary	ns
Significantly different (P < 0.05)?	Yes		Significantly different (P < 0.05)?	No
One- or two-tailed P value?	Two-tailed		One- or two-tailed P value?	Two-tailed
t, df	t=3.624, df=8		t, df	t=0.5531, df=8
How big is the difference?			How big is the difference?
Mean of column E	75.4		Mean of column G	81.6
Mean of column F	51.2		Mean of column H	79.4
Difference between means (F - E) ± SEM	-24.20 ± 6.678		Difference between means (H - G) ± SEM	-2.200 ± 3.977
95% confidence interval	-39.60 to -8.800		95% confidence interval	-11.37 to 6.972
R squared (eta squared)	0.6214		R squared (eta squared)	0.03683
F test to compare variances			F test to compare variances
F, DFn, Dfd	3.934, 4, 4		F, DFn, Dfd	3.444, 4, 4
P value	0.2132		P value	0.2583
P value summary	ns		P value summary	ns
Significantly different (P < 0.05)?	No		Significantly different (P < 0.05)?	No
Data analyzed			Data analyzed
Sample size, column E	5		Sample size, column G	5
Sample size, column F	5		Sample size, column H	5

## Sheet: FIG6D
Body bending / 30s
Day 1				Day 7
OP50		HK OP50		OP50		HK OP50
WT	lys-7; lys8	WT	lys-7; lys8	WT	lys-7; lys8	WT	lys-7; lys8
61	42	62	50	48	30	55	40
57	45	56	46	40	35	53	40
52	62	50	40	40	33	48	50
46	50	48	62	42	35	48	52
51	48	45	45	46	30	50	52
Day 7			Day 7
OP50			HK OP50
Column F	lys-7; lys8		Column H	lys-7; lys8
vs.	vs.		vs.	vs.
Column E	WT		Column G	WT
Unpaired t test			Unpaired t test
P value	0.0007		P value	0.2367
P value summary	***		P value summary	ns
Significantly different (P < 0.05)?	Yes		Significantly different (P < 0.05)?	No
One- or two-tailed P value?	Two-tailed		One- or two-tailed P value?	Two-tailed
t, df	t=5.368, df=8		t, df	t=1.279, df=8
How big is the difference?			How big is the difference?
Mean of column E	43.2		Mean of column G	50.8
Mean of column F	32.6		Mean of column H	46.8
Difference between means (F - E) ± SEM	-10.60 ± 1.975		Difference between means (H - G) ± SEM	-4.000 ± 3.127
95% confidence interval	-15.15 to -6.046		95% confidence interval	-11.21 to 3.212
R squared (eta squared)	0.7827		R squared (eta squared)	0.1698
F test to compare variances			F test to compare variances
F, DFn, Dfd	2.095, 4, 4		F, DFn, Dfd	4.041, 4, 4
P value	0.4914		P value	0.2049
P value summary	ns		P value summary	ns
Significantly different (P < 0.05)?	No		Significantly different (P < 0.05)?	No
Data analyzed			Data analyzed
Sample size, column E	5		Sample size, column G	5
Sample size, column F	5		Sample size, column H	5

## Sheet: FIG6E
		% Animals with body-cavity leakage
Day 1				Day 7
OP50		HK OP50		OP50		HK OP50
WT	lys-7; lys8	WT	lys-7; lys8	WT	lys-7; lys8	WT	lys-7; lys8
3.92	7.27	4.34	3.92	25.53	59.57	18.18	16.32
5.88	3.92	6.52	12.22	21.18	40.81	10.63	21.56
3.51	4.16	12.13	6.67	32.55	30.61	21.27	10.86
10.63	7.84	4.54	10.61	32.72	55.81	17.86	21.01
4.54	10.86	13.33	4.54	25.45	42.86	10.52	14.81
Day 7			Day 7
OP50			HK OP50
Column F	lys-7; lys8		Column H	lys-7; lys8
vs.	vs.		vs.	vs.
Column E	WT		Column G	WT
Unpaired t test			Unpaired t test
P value	0.0122		P value	0.6902
P value summary	*		P value summary	ns
Significantly different (P < 0.05)?	Yes		Significantly different (P < 0.05)?	No
One- or two-tailed P value?	Two-tailed		One- or two-tailed P value?	Two-tailed
t, df	t=3.224, df=8		t, df	t=0.4134, df=8
How big is the difference?			How big is the difference?
Mean of column E	27.49		Mean of column G	15.69
Mean of column F	45.93		Mean of column H	16.91
Difference between means (F - E) ± SEM	18.45 ± 5.722		Difference between means (H - G) ± SEM	1.220 ± 2.951
95% confidence interval	5.251 to 31.64		95% confidence interval	-5.585 to 8.025
R squared (eta squared)	0.5651		R squared (eta squared)	0.02092
F test to compare variances			F test to compare variances
F, DFn, Dfd	5.497, 4, 4		F, DFn, Dfd	1.183, 4, 4
P value	0.1275		P value	0.8747
P value summary	ns		P value summary	ns
Significantly different (P < 0.05)?	No		Significantly different (P < 0.05)?	No
Data analyzed			Data analyzed
Sample size, column E	5		Sample size, column G	5
Sample size, column F	5		Sample size, column H	5

## Sheet: FIG6F
CFU per worm (log10)
Day 1		Day 7
WT	lys-7; lys8	WT	lys-7; lys8
1.17	0.57	1.93	4.17
0.82	0.94	2.82	3.39
1.22	1.22	2.99	3.9
0.47	1.37	3.12	3.69
0.43	0.36	2.52	4.02
Day 7
Column D	lys-7; lys8
vs.	vs.
Column C	WT
Unpaired t test
P value	0.0018
P value summary	**
Significantly different (P < 0.05)?	Yes
One- or two-tailed P value?	Two-tailed
t, df	t=4.601, df=8
How big is the difference?
Mean of column C	2.676
Mean of column D	3.834
Difference between means (D - C) ± SEM	1.158 ± 0.2517
95% confidence interval	0.5776 to 1.738
R squared (eta squared)	0.7257
F test to compare variances
F, DFn, Dfd	2.427, 4, 4
P value	0.4115
P value summary	ns
Significantly different (P < 0.05)?	No
Data analyzed
Sample size, column C	5
Sample size, column D	5

## Sheet: FIG6G
Relative florenscence of mCherry (%)
Day 1		Day 7
WT	lys-7; lys8	WT	lys-7; lys8
100	97.5778	528.72	701.384
100	96.4597	413.349	666.396
100	98.488	468.179	841.581
Column D	lys-7; lys8
vs.	vs.
Column C	WT
Unpaired t test
P value	0.0134
P value summary	*
Significantly different (P < 0.05)?	Yes
One- or two-tailed P value?	Two-tailed
t, df	t=4.225, df=4
How big is the difference?
Mean of column C	470.1
Mean of column D	736.5
Difference between means (D - C) ± SEM	266.4 ± 63.05
95% confidence interval	91.32 to 441.4
R squared (eta squared)	0.8169
F test to compare variances
F, DFn, Dfd	2.581, 2, 2
P value	0.5585
P value summary	ns
Significantly different (P < 0.05)?	No
Data analyzed
Sample size, column C	3
Sample size, column D	3
