# Supplementary material for: Indole produced during dysbiosis mediates host–microorganism chemical communication
Source: eLife. 2023 Nov 21;12:e85362. doi: 10.7554/eLife.85362 (PMC10691800; doi:10.7554/eLife.85362)
Supplement: Figure 7—figure supplement 1—source data 1. [file elife-85362-fig7-figsupp1-data1.xlsx]

## Sheet: FIGS11B
	Relative florenscence of lys-7p::gfp (%)
OP50			HK OP50
Day 1	Day 4	Day 7	Day 1	Day 4	Day 7
100	204.49	275.417	103.627	85.4922	116.062
100	416.519	474.778	119.419	110.728	119.414
100	392.725	417.982	100.824	109.856	71.8463
OP50						HK OP50
Column B	Day 4		Column C	Day 7		Column E	Day 4		Column F	Day 7
vs.	vs.		vs.	vs.		vs.	vs.		vs.	vs.
Column A	Day 1		Column A	Day 1		Column D	Day 1		Column D	Day 1
Unpaired t test			Unpaired t test			Unpaired t test			Unpaired t test
P value	0.0239		P value	0.0082		P value	0.5884		P value	0.7533
P value summary	*		P value summary	**		P value summary	ns		P value summary	ns
Significantly different (P < 0.05)?	Yes		Significantly different (P < 0.05)?	Yes		Significantly different (P < 0.05)?	No		Significantly different (P < 0.05)?	No
One- or two-tailed P value?	Two-tailed		One- or two-tailed P value?	Two-tailed		One- or two-tailed P value?	Two-tailed		One- or two-tailed P value?	Two-tailed
t, df	t=3.548, df=4		t, df	t=4.880, df=4		t, df	t=0.5875, df=4		t, df	t=0.3367, df=4
How big is the difference?			How big is the difference?			How big is the difference?			How big is the difference?
Mean of column A	100		Mean of column A	100		Mean of column D	108		Mean of column D	108
Mean of column B	337.9		Mean of column C	389.4		Mean of column E	102		Mean of column F	102.4
Difference between means (B - A) ± SEM	237.9 ± 67.06		Difference between means (C - A) ± SEM	289.4 ± 59.30		Difference between means (E - D) ± SEM	-5.931 ± 10.09		Difference between means (F - D) ± SEM	-5.516 ± 16.38
95% confidence interval	51.71 to 424.1		95% confidence interval	124.8 to 454.0		95% confidence interval	-33.96 to 22.10		95% confidence interval	-51.01 to 39.97
R squared (eta squared)	0.7588		R squared (eta squared)	0.8562		R squared (eta squared)	0.07945		R squared (eta squared)	0.02755
F test to compare variances			F test to compare variances			F test to compare variances			F test to compare variances
F, DFn, Dfd	Infinity, 2, 2		F, DFn, Dfd	Infinity, 2, 2		F, DFn, Dfd	2.042, 2, 2		F, DFn, Dfd	7.013, 2, 2
P value	<0.0001		P value	<0.0001		P value	0.6575		P value	0.2496
P value summary	****		P value summary	****		P value summary	ns		P value summary	ns
Significantly different (P < 0.05)?	Yes		Significantly different (P < 0.05)?	Yes		Significantly different (P < 0.05)?	No		Significantly different (P < 0.05)?	No
Data analyzed			Data analyzed			Data analyzed			Data analyzed
Sample size, column A	3		Sample size, column A	3		Sample size, column D	3		Sample size, column D	3
Sample size, column B	3		Sample size, column C	3		Sample size, column E	3		Sample size, column F	3

## Sheet: FIGS11D
	Relative florenscence of lys-8p::gfp (%)
OP50			HK OP50
Day 1	Day 4	Day 7	Day 1	Day 4	Day 7
100	224.198	270.262	123.907	165.015	109.329
100	261.334	287.621	66.8328	74.1961	66.1576
100	388.291	396.437	155.068	138.801	141.397
OP50						HK OP50
Column B	Day 4		Column C	Day 7		Column E	Day 4		Column F	Day 7
vs.	vs.		vs.	vs.		vs.	vs.		vs.	vs.
Column A	Day 1		Column A	Day 1		Column D	Day 1		Column D	Day 1
Unpaired t test			Unpaired t test			Unpaired t test			Unpaired t test
P value	0.0183		P value	0.0052		P value	0.7881		P value	0.7896
P value summary	*		P value summary	**		P value summary	ns		P value summary	ns
Significantly different (P < 0.05)?	Yes		Significantly different (P < 0.05)?	Yes		Significantly different (P < 0.05)?	No		Significantly different (P < 0.05)?	No
One- or two-tailed P value?	Two-tailed		One- or two-tailed P value?	Two-tailed		One- or two-tailed P value?	Two-tailed		One- or two-tailed P value?	Two-tailed
t, df	t=3.850, df=4		t, df	t=5.524, df=4		t, df	t=0.2873, df=4		t, df	t=0.2852, df=4
How big is the difference?			How big is the difference?			How big is the difference?			How big is the difference?
Mean of column A	100		Mean of column A	100		Mean of column D	115.3		Mean of column D	115.3
Mean of column B	291.3		Mean of column C	318.1		Mean of column E	126		Mean of column F	105.6
Difference between means (B - A) ± SEM	191.3 ± 49.68		Difference between means (C - A) ± SEM	218.1 ± 39.48		Difference between means (E - D) ± SEM	10.73 ± 37.36		Difference between means (F - D) ± SEM	-9.641 ± 33.80
95% confidence interval	53.34 to 329.2		95% confidence interval	108.5 to 327.7		95% confidence interval	-92.99 to 114.5		95% confidence interval	-103.5 to 84.21
R squared (eta squared)	0.7875		R squared (eta squared)	0.8841		R squared (eta squared)	0.02022		R squared (eta squared)	0.01993
F test to compare variances			F test to compare variances			F test to compare variances			F test to compare variances
F, DFn, Dfd	Infinity, 2, 2		F, DFn, Dfd	Infinity, 2, 2		F, DFn, Dfd	1.091, 2, 2		F, DFn, Dfd	1.405, 2, 2
P value	<0.0001		P value	<0.0001		P value	0.9564		P value	0.8317
P value summary	****		P value summary	****		P value summary	ns		P value summary	ns
Significantly different (P < 0.05)?	Yes		Significantly different (P < 0.05)?	Yes		Significantly different (P < 0.05)?	No		Significantly different (P < 0.05)?	No
Data analyzed			Data analyzed			Data analyzed			Data analyzed
Sample size, column A	3		Sample size, column A	3		Sample size, column D	3		Sample size, column D	3
Sample size, column B	3		Sample size, column C	3		Sample size, column E	3		Sample size, column F	3

## Sheet: FIGS11E
		Relative mRNA level of lys-7
WT				daf-16(mu86)
OP50		HK OP50		OP50		HK OP50
1 day	4 day	1 day	4 day	1 day	4 day	1 day	4 day
0.97716	3.26406	0.97716	1	1.15669	0.895025	0.905634	0.981157
1.0693	2.56093	1.0693	0.876606	1.04972	0.907519	1.00486	0.627201
0.957051	3.84283	0.957051	1.06437	0.823591	1.02101	1.09962	0.827597
WT						daf-16(mu86)
OP50			HKOP50			OP50			HKOP50
Column B	4 day		Column D	4 day		Column F	4 day		Column H	4 day
vs.	vs.		vs.	vs.		vs.	vs.		vs.	vs.
Column A	1 day		Column C	1 day		Column E	1 day		Column G	1 day
Unpaired t test			Unpaired t test			Unpaired t test			Unpaired t test
P value	0.004		P value	0.7646		P value	0.5518		P value	0.1766
P value summary	**		P value summary	ns		P value summary	ns		P value summary	ns
Significantly different (P < 0.05)?	Yes		Significantly different (P < 0.05)?	No		Significantly different (P < 0.05)?	No		Significantly different (P < 0.05)?	No
One- or two-tailed P value?	Two-tailed		One- or two-tailed P value?	Two-tailed		One- or two-tailed P value?	Two-tailed		One- or two-tailed P value?	Two-tailed
t, df	t=5.968, df=4		t, df	t=0.3205, df=4		t, df	t=0.6489, df=4		t, df	t=1.639, df=4
How big is the difference?			How big is the difference?			How big is the difference?			How big is the difference?
Mean of column A	1.001		Mean of column C	1.001		Mean of column E	1.01		Mean of column G	1.003
Mean of column B	3.223		Mean of column D	0.9803		Mean of column F	0.9412		Mean of column H	0.812
Difference between means (B - A) ± SEM	2.221 ± 0.3722		Difference between means (D - C) ± SEM	-0.02084 ± 0.06503		Difference between means (F - E) ± SEM	-0.06881 ± 0.1061		Difference between means (H - G) ± SEM	-0.1914 ± 0.1168
95% confidence interval	1.188 to 3.255		95% confidence interval	-0.2014 to 0.1597		95% confidence interval	-0.3633 to 0.2256		95% confidence interval	-0.5156 to 0.1328
R squared (eta squared)	0.899		R squared (eta squared)	0.02504		R squared (eta squared)	0.09524		R squared (eta squared)	0.4017
F test to compare variances			F test to compare variances			F test to compare variances			F test to compare variances
F, DFn, Dfd	115.0, 2, 2		F, DFn, Dfd	2.541, 2, 2		F, DFn, Dfd	6.003, 2, 2		F, DFn, Dfd	3.348, 2, 2
P value	0.0172		P value	0.5647		P value	0.2856		P value	0.4599
P value summary	*		P value summary	ns		P value summary	ns		P value summary	ns
Significantly different (P < 0.05)?	Yes		Significantly different (P < 0.05)?	No		Significantly different (P < 0.05)?	No		Significantly different (P < 0.05)?	No
Data analyzed			Data analyzed			Data analyzed			Data analyzed
Sample size, column A	3		Sample size, column C	3		Sample size, column E	3		Sample size, column G	3
Sample size, column B	3		Sample size, column D	3		Sample size, column F	3		Sample size, column H	3

## Sheet: FIGS11F
		Relative mRNA level of lys-8
WT				daf-16(mu86)
OP50		HK OP50		OP50		HK OP50
1 day	4 day	1 day	4 day	1 day	4 day	1 day	4 day
1.06683	2.74157	1.07674	1.23971	1.23114	1.23971	1.16231	0.773993
1.05215	3.43682	0.911723	1.00696	0.747425	1.00696	0.944092	0.995845
0.890899	3.98156	1.01866	0.972655	1.09429	0.972655	0.911933	1.45095
WT						daf-16(mu86)
OP50			HKOP50			OP50			HKOP50
Column B	4 day		Column D	4 day		Column F	4 day		Column H	4 day
vs.	vs.		vs.	vs.		vs.	vs.		vs.	vs.
Column A	1 day		Column C	1 day		Column E	1 day		Column G	1 day
Unpaired t test			Unpaired t test			Unpaired t test			Unpaired t test
P value	0.0028		P value	0.5055		P value	0.7841		P value	0.7685
P value summary	**		P value summary	ns		P value summary	ns		P value summary	ns
Significantly different (P < 0.05)?	Yes		Significantly different (P < 0.05)?	No		Significantly different (P < 0.05)?	No		Significantly different (P < 0.05)?	No
One- or two-tailed P value?	Two-tailed		One- or two-tailed P value?	Two-tailed		One- or two-tailed P value?	Two-tailed		One- or two-tailed P value?	Two-tailed
t, df	t=6.562, df=4		t, df	t=0.7306, df=4		t, df	t=0.2930, df=4		t, df	t=0.3150, df=4
How big is the difference?			How big is the difference?			How big is the difference?			How big is the difference?
Mean of column A	1.003		Mean of column C	1.002		Mean of column E	1.024		Mean of column G	1.006
Mean of column B	3.387		Mean of column D	1.073		Mean of column F	1.073		Mean of column H	1.074
Difference between means (B - A) ± SEM	2.383 ± 0.3632		Difference between means (D - C) ± SEM	0.07073 ± 0.09681		Difference between means (F - E) ± SEM	0.04882 ± 0.1666		Difference between means (H - G) ± SEM	0.06748 ± 0.2142
95% confidence interval	1.375 to 3.392		95% confidence interval	-0.1981 to 0.3395		95% confidence interval	-0.4138 to 0.5114		95% confidence interval	-0.5273 to 0.6622
R squared (eta squared)	0.915		R squared (eta squared)	0.1177		R squared (eta squared)	0.02101		R squared (eta squared)	0.02421
F test to compare variances			F test to compare variances			F test to compare variances			F test to compare variances
F, DFn, Dfd	40.54, 2, 2		F, DFn, Dfd	3.013, 2, 2		F, DFn, Dfd	2.945, 2, 2		F, DFn, Dfd	6.418, 2, 2
P value	0.0481		P value	0.4984		P value	0.507		P value	0.2696
P value summary	*		P value summary	ns		P value summary	ns		P value summary	ns
Significantly different (P < 0.05)?	Yes		Significantly different (P < 0.05)?	No		Significantly different (P < 0.05)?	No		Significantly different (P < 0.05)?	No
Data analyzed			Data analyzed			Data analyzed			Data analyzed
Sample size, column A	3		Sample size, column C	3		Sample size, column E	3		Sample size, column G	3
Sample size, column B	3		Sample size, column D	3		Sample size, column F	3		Sample size, column H	3
