# Supplementary material for: Indole produced during dysbiosis mediates host–microorganism chemical communication
Source: eLife. 2023 Nov 21;12:e85362. doi: 10.7554/eLife.85362 (PMC10691800; doi:10.7554/eLife.85362)
Supplement: Figure 7—figure supplement 2—source data 1. [file elife-85362-fig7-figsupp2-data1.xlsx]

## Sheet: FIGS12A
			TU3401
Relative mRNA level of lys-7				Relative mRNA level of lys-8
Day 1		Day 4		Day 1		Day 4
EV	trpa-1RNAi	EV	trpa-1RNAi	EV	trpa-1RNAi	EV	trpa-1RNAi
1.15402	0.963707	3.13834	1.11729	0.959264	1.23114	6.06287	3.81055
0.950439	2.00926	3.43426	0.939523	1.03527	1.10957	4.75683	2.71321
0.911722	1.74917	2.63902	1.18099	1.00696	1.60214	5.38893	3.78423
Relative mRNA level of lys-7						Relative mRNA level of lys-8
Day 4 vs Day 1			Day4			Day 4 vs Day 1			Day4
Column C	EV		Column D	trpa-1RNAi		Column G	EV		Column H	trpa-1RNAi
vs.	vs.		vs.	vs.		vs.	vs.		vs.	vs.
Column A	EV		Column C	EV		Column E	EV		Column G	EV
Unpaired t test			Unpaired t test			Unpaired t test			Unpaired t test
P value	0.0011		P value	0.0012		P value	0.0003		P value	0.0197
P value summary	**		P value summary	**		P value summary	***		P value summary	*
Significantly different (P < 0.05)?	Yes		Significantly different (P < 0.05)?	Yes		Significantly different (P < 0.05)?	Yes		Significantly different (P < 0.05)?	Yes
One- or two-tailed P value?	Two-tailed		One- or two-tailed P value?	Two-tailed		One- or two-tailed P value?	Two-tailed		One- or two-tailed P value?	Two-tailed
t, df	t=8.466, df=4		t, df	t=8.193, df=4		t, df	t=11.65, df=4		t, df	t=3.765, df=4
How big is the difference?			How big is the difference?			How big is the difference?			How big is the difference?
Mean of column A	1.005		Mean of column C	3.071		Mean of column E	1		Mean of column G	5.403
Mean of column C	3.071		Mean of column D	1.079		Mean of column G	5.403		Mean of column H	3.436
Difference between means (C - A) ± SEM	2.065 ± 0.2439		Difference between means (D - C) ± SEM	-1.991 ± 0.2430		Difference between means (G - E) ± SEM	4.402 ± 0.3777		Difference between means (H - G) ± SEM	-1.967 ± 0.5224
95% confidence interval	1.388 to 2.742		95% confidence interval	-2.666 to -1.316		95% confidence interval	3.354 to 5.451		95% confidence interval	-3.417 to -0.5166
R squared (eta squared)	0.9471		R squared (eta squared)	0.9438		R squared (eta squared)	0.9714		R squared (eta squared)	0.78
F test to compare variances			F test to compare variances			F test to compare variances			F test to compare variances
F, DFn, Dfd	9.536, 2, 2		F, DFn, Dfd	10.32, 2, 2		F, DFn, Dfd	289.1, 2, 2		F, DFn, Dfd	1.088, 2, 2
P value	0.1898		P value	0.1767		P value	0.0069		P value	0.9577
P value summary	ns		P value summary	ns		P value summary	**		P value summary	ns
Significantly different (P < 0.05)?	No		Significantly different (P < 0.05)?	No		Significantly different (P < 0.05)?	Yes		Significantly different (P < 0.05)?	No
Data analyzed			Data analyzed			Data analyzed			Data analyzed
Sample size, column A	3		Sample size, column C	3		Sample size, column E	3		Sample size, column G	3
Sample size, column C	3		Sample size, column D	3		Sample size, column G	3		Sample size, column H	3

## Sheet: FIGS12B
			MGH170
Relative mRNA level of lys-7				Relative mRNA level of lys-8
Day 1		Day 4		Day 1		Day 4
EV	trpa-1RNAi	EV	trpa-1RNAi	EV	trpa-1RNAi	EV	trpa-1RNAi
0.965936	1.07177	3.70635	3.09513	0.97942	0.858565	3.97237	4.02782
0.888843	1.01396	2.92817	2.71321	0.840896	0.482968	2.96905	3.45815
1.16473	0.876606	2.37841	2.42839	1.21419	0.447513	3.70635	2.88786
Relative mRNA level of lys-7						Relative mRNA level of lys-8
Day 4 vs Day 1			Day4			Day 4 vs Day 1			Day4
Column C	EV		Column D	trpa-1RNAi		Column G	EV		Column H	trpa-1RNAi
vs.	vs.		vs.	vs.		vs.	vs.		vs.	vs.
Column A	EV		Column C	EV		Column E	EV		Column G	EV
Unpaired t test			Unpaired t test			Unpaired t test			Unpaired t test
P value	0.0071		P value	0.5806		P value	0.0014		P value	0.8476
P value summary	**		P value summary	ns		P value summary	**		P value summary	ns
Significantly different (P < 0.05)?	Yes		Significantly different (P < 0.05)?	No		Significantly different (P < 0.05)?	Yes		Significantly different (P < 0.05)?	No
One- or two-tailed P value?	Two-tailed		One- or two-tailed P value?	Two-tailed		One- or two-tailed P value?	Two-tailed		One- or two-tailed P value?	Two-tailed
t, df	t=5.072, df=4		t, df	t=0.6004, df=4		t, df	t=7.949, df=4		t, df	t=0.2050, df=4
How big is the difference?			How big is the difference?			How big is the difference?			How big is the difference?
Mean of column A	1.007		Mean of column C	3.004		Mean of column E	1.012		Mean of column G	3.549
Mean of column C	3.004		Mean of column D	2.746		Mean of column G	3.549		Mean of column H	3.458
Difference between means (C - A) ± SEM	1.998 ± 0.3939		Difference between means (D - C) ± SEM	-0.2587 ± 0.4309		Difference between means (G - E) ± SEM	2.538 ± 0.3193		Difference between means (H - G) ± SEM	-0.09131 ± 0.4454
95% confidence interval	0.9042 to 3.091		95% confidence interval	-1.455 to 0.9377		95% confidence interval	1.651 to 3.424		95% confidence interval	-1.328 to 1.145
R squared (eta squared)	0.8654		R squared (eta squared)	0.08267		R squared (eta squared)	0.9405		R squared (eta squared)	0.0104
F test to compare variances			F test to compare variances			F test to compare variances			F test to compare variances
F, DFn, Dfd	21.97, 2, 2		F, DFn, Dfd	3.978, 2, 2		F, DFn, Dfd	7.587, 2, 2		F, DFn, Dfd	1.202, 2, 2
P value	0.0871		P value	0.4018		P value	0.2329		P value	0.9081
P value summary	ns		P value summary	ns		P value summary	ns		P value summary	ns
Significantly different (P < 0.05)?	No		Significantly different (P < 0.05)?	No		Significantly different (P < 0.05)?	No		Significantly different (P < 0.05)?	No
Data analyzed			Data analyzed			Data analyzed			Data analyzed
Sample size, column A	3		Sample size, column C	3		Sample size, column E	3		Sample size, column G	3
Sample size, column C	3		Sample size, column D	3		Sample size, column G	3		Sample size, column H	3

## Sheet: FIGS12C
			TU3401
Relative mRNA level of lys-7				Relative mRNA level of lys-8
DMSO		Indole		DMSO		Indole
EV	trpa-1RNAi	EV	trpa-1RNAi	EV	trpa-1RNAi	EV	trpa-1RNAi
0.733636	1.38813	9.06593	0.719067	0.815588	0.850854	2.19906	0.620237
1.2393	1.58658	7.90153	0.915947	0.93215	0.910526	3.42811	0.591118
1.09987	1.81858	8.06189	1.35439	1.31536	1.26446	2.64351	0.666811
Relative mRNA level of lys-7						Relative mRNA level of lys-8
DMSO vs Indole			Indole			DMSO vs Indole			Indole
Column C	EV		Column D	trpa-1RNAi		Column G	EV		Column H	trpa-1RNAi
vs.	vs.		vs.	vs.		vs.	vs.		vs.	vs.
Column A	EV		Column C	EV		Column E	EV		Column G	EV
Unpaired t test			Unpaired t test			Unpaired t test			Unpaired t test
P value	<0.001		P value	<0.001		P value	0.0112		P value	0.0041
P value summary	***		P value summary	***		P value summary	*		P value summary	**
Significantly different (P < 0.05)?	Yes		Significantly different (P < 0.05)?	Yes		Significantly different (P < 0.05)?	Yes		Significantly different (P < 0.05)?	Yes
One- or two-tailed P value?	Two-tailed		One- or two-tailed P value?	Two-tailed		One- or two-tailed P value?	Two-tailed		One- or two-tailed P value?	Two-tailed
t, df	t=18.56, df=4		t, df	t=17.92, df=4		t, df	t=4.454, df=4		t, df	t=5.919, df=4
How big is the difference?			How big is the difference?			How big is the difference?			How big is the difference?
Mean of column A	1.024		Mean of column C	8.343		Mean of column E	1.021		Mean of column G	2.757
Mean of column C	8.343		Mean of column D	0.9965		Mean of column G	2.757		Mean of column H	0.6261
Difference between means (C - A) ± SEM	7.319 ± 0.3943		Difference between means (D - C) ± SEM	-7.347 ± 0.4099		Difference between means (G - E) ± SEM	1.736 ± 0.3897		Difference between means (H - G) ± SEM	-2.131 ± 0.3600
95% confidence interval	6.224 to 8.414		95% confidence interval	-8.485 to -6.209		95% confidence interval	0.6538 to 2.818		95% confidence interval	-3.130 to -1.131
R squared (eta squared)	0.9885		R squared (eta squared)	0.9877		R squared (eta squared)	0.8322		R squared (eta squared)	0.8975
F test to compare variances			F test to compare variances			F test to compare variances			F test to compare variances
F, DFn, Dfd	5.839, 2, 2		F, DFn, Dfd	3.765, 2, 2		F, DFn, Dfd	5.665, 2, 2		F, DFn, Dfd	265.7, 2, 2
P value	0.2924		P value	0.4197		P value	0.3001		P value	0.0075
P value summary	ns		P value summary	ns		P value summary	ns		P value summary	**
Significantly different (P < 0.05)?	No		Significantly different (P < 0.05)?	No		Significantly different (P < 0.05)?	No		Significantly different (P < 0.05)?	Yes
Data analyzed			Data analyzed			Data analyzed			Data analyzed
Sample size, column A	3		Sample size, column C	3		Sample size, column E	3		Sample size, column G	3
Sample size, column C	3		Sample size, column D	3		Sample size, column G	3		Sample size, column H	3

## Sheet: FIGS12D
			MGH170
Relative mRNA level of lys-7				Relative mRNA level of lys-8
DMSO		Indole		DMSO		Indole
EV	trpa-1RNAi	EV	trpa-1RNAi	EV	trpa-1RNAi	EV	trpa-1RNAi
0.820649	0.410434	2.27796	3.31917	0.773737	0.476029	1.73068	2.74262
0.926051	0.586009	2.79098	2.54853	1.19743	0.662493	1.99246	1.38904
1.31585	0.810579	2.97355	2.72704	1.07934	1.04456	2.22454	2.80225
Relative mRNA level of lys-7						Relative mRNA level of lys-8
DMSO vs Indole			Indole			DMSO vs Indole			Indole
Column C	EV		Column D	trpa-1RNAi		Column G	EV		Column H	trpa-1RNAi
vs.	vs.		vs.	vs.		vs.	vs.		vs.	vs.
Column A	EV		Column C	EV		Column E	EV		Column G	EV
Unpaired t test			Unpaired t test			Unpaired t test			Unpaired t test
P value	0.003		P value	0.5874		P value	0.0071		P value	0.5335
P value summary	**		P value summary	ns		P value summary	**		P value summary	ns
Significantly different (P < 0.05)?	Yes		Significantly different (P < 0.05)?	No		Significantly different (P < 0.05)?	Yes		Significantly different (P < 0.05)?	No
One- or two-tailed P value?	Two-tailed		One- or two-tailed P value?	Two-tailed		One- or two-tailed P value?	Two-tailed		One- or two-tailed P value?	Two-tailed
t, df	t=6.460, df=4		t, df	t=0.5893, df=4		t, df	t=5.070, df=4		t, df	t=0.6806, df=4
How big is the difference?			How big is the difference?			How big is the difference?			How big is the difference?
Mean of column A	1.021		Mean of column C	2.681		Mean of column E	1.017		Mean of column G	1.983
Mean of column C	2.681		Mean of column D	2.865		Mean of column G	1.983		Mean of column H	2.311
Difference between means (C - A) ± SEM	1.660 ± 0.2570		Difference between means (D - C) ± SEM	0.1841 ± 0.3124		Difference between means (G - E) ± SEM	0.9657 ± 0.1905		Difference between means (H - G) ± SEM	0.3287 ± 0.4830
95% confidence interval	0.9465 to 2.373		95% confidence interval	-0.6833 to 1.051		95% confidence interval	0.4369 to 1.495		95% confidence interval	-1.012 to 1.670
R squared (eta squared)	0.9125		R squared (eta squared)	0.07987		R squared (eta squared)	0.8653		R squared (eta squared)	0.1038
F test to compare variances			F test to compare variances			F test to compare variances			F test to compare variances
F, DFn, Dfd	1.911, 2, 2		F, DFn, Dfd	1.251, 2, 2		F, DFn, Dfd	1.277, 2, 2		F, DFn, Dfd	10.46, 2, 2
P value	0.687		P value	0.8884		P value	0.8784		P value	0.1745
P value summary	ns		P value summary	ns		P value summary	ns		P value summary	ns
Significantly different (P < 0.05)?	No		Significantly different (P < 0.05)?	No		Significantly different (P < 0.05)?	No		Significantly different (P < 0.05)?	No
Data analyzed			Data analyzed			Data analyzed			Data analyzed
Sample size, column A	3		Sample size, column C	3		Sample size, column E	3		Sample size, column G	3
Sample size, column C	3		Sample size, column D	3		Sample size, column G	3		Sample size, column H	3
