# Supplementary material for: Indole produced during dysbiosis mediates host–microorganism chemical communication
Source: eLife. 2023 Nov 21;12:e85362. doi: 10.7554/eLife.85362 (PMC10691800; doi:10.7554/eLife.85362)
Supplement: Figure 7—source data 1. [file elife-85362-fig7-data1.xlsx]

## Sheet: FIG7A
		Relative florenscence of lys-7p::gfp (%)
Day 1			Day 4			Day 7
EV	daf-16 RNAi	trpa-1 RNAi	EV	daf-16 RNAi	trpa-1 RNAi	EV	daf-16 RNAi	trpa-1 RNAi
100	80.5208	94.9391	356.232	102.382	226.898	285.942	68.8881	110.403
100	106.217	89.6572	373.039	129.634	198.838	426.787	97.2109	189.192
100	124.684	124.758	394.796	116.282	306.914	499.034	134.647	189.145
Day 1						Day 4
Column B	daf-16 RNAi		Column C	trpa-1 RNAi		Column E	daf-16 RNAi		Column F	trpa-1 RNAi
vs.	vs.		vs.	vs.		vs.	vs.		vs.	vs.
Column A	EV		Column A	EV		Column D	EV		Column D	EV
Unpaired t test			Unpaired t test			Unpaired t test			Unpaired t test
P value	0.781		P value	0.7895		P value	<0.001		P value	0.0189
P value summary	ns		P value summary	ns		P value summary	***		P value summary	*
Significantly different (P < 0.05)?	No		Significantly different (P < 0.05)?	No		Significantly different (P < 0.05)?	Yes		Significantly different (P < 0.05)?	Yes
One- or two-tailed P value?	Two-tailed		One- or two-tailed P value?	Two-tailed		One- or two-tailed P value?	Two-tailed		One- or two-tailed P value?	Two-tailed
t, df	t=0.2973, df=4		t, df	t=0.2854, df=4		t, df	t=18.94, df=4		t, df	t=3.810, df=4
How big is the difference?			How big is the difference?			How big is the difference?			How big is the difference?
Mean of column A	100		Mean of column A	100		Mean of column D	374.7		Mean of column D	374.7
Mean of column B	103.8		Mean of column C	103.1		Mean of column E	116.1		Mean of column F	244.2
Difference between means (B - A) ± SEM	3.807 ± 12.81		Difference between means (C - A) ± SEM	3.118 ± 10.93		Difference between means (E - D) ± SEM	-258.6 ± 13.66		Difference between means (F - D) ± SEM	-130.5 ± 34.25
95% confidence interval	-31.75 to 39.36		95% confidence interval	-27.22 to 33.46		95% confidence interval	-296.5 to -220.7		95% confidence interval	-225.6 to -35.38
R squared (eta squared)	0.02162		R squared (eta squared)	0.01995		R squared (eta squared)	0.989		R squared (eta squared)	0.7839
F test to compare variances			F test to compare variances			F test to compare variances			F test to compare variances
F, DFn, Dfd	Infinity, 2, 2		F, DFn, Dfd	Infinity, 2, 2		F, DFn, Dfd	2.013, 2, 2		F, DFn, Dfd	8.413, 2, 2
P value	<0.0001		P value	<0.0001		P value	0.6638		P value	0.2125
P value summary	****		P value summary	****		P value summary	ns		P value summary	ns
Significantly different (P < 0.05)?	Yes		Significantly different (P < 0.05)?	Yes		Significantly different (P < 0.05)?	No		Significantly different (P < 0.05)?	No
Data analyzed			Data analyzed			Data analyzed			Data analyzed
Sample size, column A	3		Sample size, column A	3		Sample size, column D	3		Sample size, column D	3
Sample size, column B	3		Sample size, column C	3		Sample size, column E	3		Sample size, column F	3
Day 7
Column H	daf-16 RNAi		Column I	trpa-1 RNAi
vs.	vs.		vs.	vs.
Column G	EV		Column G	EV
Unpaired t test			Unpaired t test
P value	0.0097		P value	0.0238
P value summary	**		P value summary	*
Significantly different (P < 0.05)?	Yes		Significantly different (P < 0.05)?	Yes
One- or two-tailed P value?	Two-tailed		One- or two-tailed P value?	Two-tailed
t, df	t=4.643, df=4		t, df	t=3.552, df=4
How big is the difference?			How big is the difference?
Mean of column G	403.9		Mean of column G	403.9
Mean of column H	100.2		Mean of column I	162.9
Difference between means (H - G) ± SEM	-303.7 ± 65.40		Difference between means (I - G) ± SEM	-241.0 ± 67.85
95% confidence interval	-485.3 to -122.1		95% confidence interval	-429.4 to -52.62
R squared (eta squared)	0.8435		R squared (eta squared)	0.7593
F test to compare variances			F test to compare variances
F, DFn, Dfd	10.79, 2, 2		F, DFn, Dfd	5.679, 2, 2
P value	0.1696		P value	0.2994
P value summary	ns		P value summary	ns
Significantly different (P < 0.05)?	No		Significantly different (P < 0.05)?	No
Data analyzed			Data analyzed
Sample size, column G	3		Sample size, column G	3
Sample size, column H	3		Sample size, column I	3

## Sheet: FIG7B
		Relative florenscence of lys-8p::gfp (%)
Day 1			Day 4			Day 7
EV	daf-16 RNAi	trpa-1 RNAi	EV	daf-16 RNAi	trpa-1 RNAi	EV	daf-16 RNAi	trpa-1 RNAi
100	85.8696	96	541.217	99.8261	137.565	625.391	112.174	142.261
100	82.6192	97.1684	538.301	117.437	100.149	396.423	99.851	128.391
100	106.59	137.544	498.057	99.2049	147.792	553.887	137.809	137.456
Day 1						Day 4
Column B	daf-16 RNAi		Column C	trpa-1 RNAi		Column E	daf-16 RNAi		Column F	trpa-1 RNAi
vs.	vs.		vs.	vs.		vs.	vs.		vs.	vs.
Column A	EV		Column A	EV		Column D	EV		Column D	EV
Unpaired t test			Unpaired t test			Unpaired t test			Unpaired t test
P value	0.3306		P value	0.4952		P value	<0.001		P value	<0.001
P value summary	ns		P value summary	ns		P value summary	***		P value summary	***
Significantly different (P < 0.05)?	No		Significantly different (P < 0.05)?	No		Significantly different (P < 0.05)?	Yes		Significantly different (P < 0.05)?	Yes
One- or two-tailed P value?	Two-tailed		One- or two-tailed P value?	Two-tailed		One- or two-tailed P value?	Two-tailed		One- or two-tailed P value?	Two-tailed
t, df	t=1.107, df=4		t, df	t=0.7496, df=4		t, df	t=27.74, df=4		t, df	t=19.78, df=4
How big is the difference?			How big is the difference?			How big is the difference?			How big is the difference?
Mean of column A	100		Mean of column A	100		Mean of column D	525.9		Mean of column D	525.9
Mean of column B	91.69		Mean of column C	110.2		Mean of column E	105.5		Mean of column F	128.5
Difference between means (B - A) ± SEM	-8.307 ± 7.507		Difference between means (C - A) ± SEM	10.24 ± 13.66		Difference between means (E - D) ± SEM	-420.4 ± 15.15		Difference between means (F - D) ± SEM	-397.4 ± 20.09
95% confidence interval	-29.15 to 12.54		95% confidence interval	-27.68 to 48.16		95% confidence interval	-462.4 to -378.3		95% confidence interval	-453.1 to -341.6
R squared (eta squared)	0.2344		R squared (eta squared)	0.1232		R squared (eta squared)	0.9948		R squared (eta squared)	0.9899
F test to compare variances			F test to compare variances			F test to compare variances			F test to compare variances
F, DFn, Dfd	Infinity, 2, 2		F, DFn, Dfd	Infinity, 2, 2		F, DFn, Dfd	5.430, 2, 2		F, DFn, Dfd	1.081, 2, 2
P value	<0.001		P value	<0.001		P value	0.311		P value	0.961
P value summary	***		P value summary	***		P value summary	ns		P value summary	ns
Significantly different (P < 0.05)?	Yes		Significantly different (P < 0.05)?	Yes		Significantly different (P < 0.05)?	No		Significantly different (P < 0.05)?	No
Data analyzed			Data analyzed			Data analyzed			Data analyzed
Sample size, column A	3		Sample size, column A	3		Sample size, column D	3		Sample size, column D	3
Sample size, column B	3		Sample size, column C	3		Sample size, column E	3		Sample size, column F	3
Day 7
Column H	daf-16 RNAi		Column I	trpa-1 RNAi
vs.	vs.		vs.	vs.
Column G	EV		Column G	EV
Unpaired t test			Unpaired t test
P value	0.004		P value	0.0046
P value summary	**		P value summary	**
Significantly different (P < 0.05)?	Yes		Significantly different (P < 0.05)?	Yes
One- or two-tailed P value?	Two-tailed		One- or two-tailed P value?	Two-tailed
t, df	t=5.961, df=4		t, df	t=5.744, df=4
How big is the difference?			How big is the difference?
Mean of column G	525.2		Mean of column G	525.2
Mean of column H	116.6		Mean of column I	136
Difference between means (H - G) ± SEM	-408.6 ± 68.55		Difference between means (I - G) ± SEM	-389.2 ± 67.75
95% confidence interval	-598.9 to -218.3		95% confidence interval	-577.3 to -201.1
R squared (eta squared)	0.8988		R squared (eta squared)	0.8919
F test to compare variances			F test to compare variances
F, DFn, Dfd	36.60, 2, 2		F, DFn, Dfd	276.6, 2, 2
P value	0.0532		P value	0.0072
P value summary	ns		P value summary	**
Significantly different (P < 0.05)?	No		Significantly different (P < 0.05)?	Yes
Data analyzed			Data analyzed
Sample size, column G	3		Sample size, column G	3
Sample size, column H	3		Sample size, column I	3

## Sheet: FIG7C
Relative florenscence of lys-7p::gfp (%)
Day 1		Day 4		Day 7
K12	K12 ΔtnaA	K12	K12 ΔtnaA	K12	K12 ΔtnaA
100	93.7099	291.913	148.524	349.053	206.932
100	94.1924	394.858	87.8403	503.388	152.087
100	109.091	390.033	94.3045	340.8	99.7809
Day 4			Day 7
Column D	K12 ΔtnaA		Column F	K12 ΔtnaA
vs.	vs.		vs.	vs.
Column C	K12		Column E	K12
Unpaired t test			Unpaired t test
P value	0.003		P value	0.0162
P value summary	**		P value summary	*
Significantly different (P < 0.05)?	Yes		Significantly different (P < 0.05)?	Yes
One- or two-tailed P value?	Two-tailed		One- or two-tailed P value?	Two-tailed
t, df	t=6.432, df=4		t, df	t=3.996, df=4
How big is the difference?			How big is the difference?
Mean of column C	358.9		Mean of column E	397.7
Mean of column D	110.2		Mean of column F	152.9
Difference between means (D - C) ± SEM	-248.7 ± 38.67		Difference between means (F - E) ± SEM	-244.8 ± 61.26
95% confidence interval	-356.1 to -141.4		95% confidence interval	-414.9 to -74.73
R squared (eta squared)	0.9118		R squared (eta squared)	0.7997
F test to compare variances			F test to compare variances
F, DFn, Dfd	3.039, 2, 2		F, DFn, Dfd	2.921, 2, 2
P value	0.4952		P value	0.51
P value summary	ns		P value summary	ns
Significantly different (P < 0.05)?	No		Significantly different (P < 0.05)?	No
Data analyzed			Data analyzed
Sample size, column C	3		Sample size, column E	3
Sample size, column D	3		Sample size, column F	3

## Sheet: FIG7D
Relative florenscence of lys-8p::gfp (%)
Day 1		Day 4		Day 7
K12	K12 ΔtnaA	K12	K12 ΔtnaA	K12	K12 ΔtnaA
100	106.699	291.913	138.756	377.193	155.183
100	132.787	394.858	135.768	472.727	140.313
100	83.6912	390.033	134.126	377.887	123.157
Day 4			Day 7
Column D	K12 ΔtnaA		Column F	K12 ΔtnaA
vs.	vs.		vs.	vs.
Column C	K12		Column E	K12
Unpaired t test			Unpaired t test
P value	0.0027		P value	0.0012
P value summary	**		P value summary	**
Significantly different (P < 0.05)?	Yes		Significantly different (P < 0.05)?	Yes
One- or two-tailed P value?	Two-tailed		One- or two-tailed P value?	Two-tailed
t, df	t=6.635, df=4		t, df	t=8.161, df=4
How big is the difference?			How big is the difference?
Mean of column C	358.9		Mean of column E	409.3
Mean of column D	136.2		Mean of column F	139.6
Difference between means (D - C) ± SEM	-222.7 ± 33.57		Difference between means (F - E) ± SEM	-269.7 ± 33.05
95% confidence interval	-315.9 to -129.5		95% confidence interval	-361.5 to -178.0
R squared (eta squared)	0.9167		R squared (eta squared)	0.9433
F test to compare variances			F test to compare variances
F, DFn, Dfd	612.5, 2, 2		F, DFn, Dfd	11.76, 2, 2
P value	0.0033		P value	0.1568
P value summary	**		P value summary	ns
Significantly different (P < 0.05)?	Yes		Significantly different (P < 0.05)?	No
Data analyzed			Data analyzed
Sample size, column C	3		Sample size, column E	3
Sample size, column D	3		Sample size, column F	3

## Sheet: FIG7E
Relative florenscence of lys-7p::gfp (%)
DMSO	Indole
100	181.447
100	245.458
100	324.983
Column B	Indole
vs.	vs.
Column A	DMSO
Unpaired t test
P value	0.0222
P value summary	*
Significantly different (P < 0.05)?	Yes
One- or two-tailed P value?	Two-tailed
t, df	t=3.628, df=4
How big is the difference?
Mean of column A	100
Mean of column B	250.6
Difference between means (B - A) ± SEM	150.6 ± 41.52
95% confidence interval	35.36 to 265.9
R squared (eta squared)	0.767
F test to compare variances
F, DFn, Dfd	Infinity, 2, 2
P value	<0.0001
P value summary	****
Significantly different (P < 0.05)?	Yes
Data analyzed
Sample size, column A	3
Sample size, column B	3

## Sheet: FIG7F
Relative florenscence of lys-8p::gfp (%)
DMSO	Indole
100	288.889
100	341.436
100	356.184
Column B	Indole
vs.	vs.
Column A	DMSO
Unpaired t test
P value	0.0004
P value summary	***
Significantly different (P < 0.05)?	Yes
One- or two-tailed P value?	Two-tailed
t, df	t=11.21, df=4
How big is the difference?
Mean of column A	100
Mean of column B	328.8
Difference between means (B - A) ± SEM	228.8 ± 20.42
95% confidence interval	172.1 to 285.5
R squared (eta squared)	0.9691
F test to compare variances
F, DFn, Dfd	Infinity, 2, 2
P value	<0.001
P value summary	***
Significantly different (P < 0.05)?	Yes
Data analyzed
Sample size, column A	3
Sample size, column B	3
